# Supplementary material for: Strongly fluorescent indolizine-based coumarin analogs
Source: Royal Society of Chemistry journal article supplement (doi:10.1039/d4qo01216j), 2024-01-01

# Supporting Information

## Strongly fluorescent indolizine-based coumarin analogs

Jaqueline S. A. Badaro,<sup>a</sup> Antoni Wrzosek,<sup>b</sup> Olaf Morawski,<sup>c</sup> Adam Szewczyk,<sup>\*b</sup> Irena Deperasińska,<sup>\*c</sup> and Daniel T. Gryko,<sup>\*a</sup>

<sup>a</sup>*Institute of Organic Chemistry, Polish Academy of Sciences, Kasprzaka 44/52, 01-224 Warsaw, Poland.*

<sup>b</sup>*Nencki Institute of Experimental Biology, Polish Academy of Sciences, Pasteur 3, 02-093 Warsaw, Poland.*

<sup>c</sup>*Institute of Physics, Polish Academy of Sciences, Al. Lotników 32/46, 02-668 Warsaw, Poland*

### Table of Contents

|                                                                  |           |
|------------------------------------------------------------------|-----------|
| <b>1. Computational Details .....</b>                            | <b>2</b>  |
| <b>2. Photophysical measurements .....</b>                       | <b>12</b> |
| <b>3. Imaging Studies .....</b>                                  | <b>22</b> |
| <b>4. <sup>1</sup>H NMR and <sup>13</sup>C NMR spectra .....</b> | <b>23</b> |

## 1. Computational Details

Table S1. Absorption and fluorescence energies and their oscillator strengths for molecules in DMSO solution calculated using the M06 and O3LYP functionals along with experimental data.

| Solvent: DMSO |            | experiment | M06/6-31G(d,p) |        | O3LYP/6-31G(d,p)        |                  |
|---------------|------------|------------|----------------|--------|-------------------------|------------------|
| molecule      | transition | E [nm]     | E [nm]         | f      | E [nm]                  | f                |
| <b>2b</b>     | abs        | 449        | 407            | 0.7423 | 422                     | 0.6367           |
|               | flu        | 481        | 437            | 0.6599 | 470                     | 0.3896           |
| <b>2a</b>     | abs        | 444        | 402            | 0.7657 | 417                     | 0.6591           |
|               | flu        | 475        | 428            | 0.6903 | 460                     | 0.4231           |
| <b>2c</b>     | abs        | 466        | 423            | 0.6749 | 440                     | 0.5488           |
|               | flu        | 503        | 465            | 0.5339 | 512                     | 0.3075           |
| <b>3aa</b>    | abs        | 451        | 417            | 0.6453 | 437                     | 0.5194           |
|               | flu        | 501        | 456            | 0.5153 | 500                     | 0.3112           |
| <b>4a</b>     | abs        | 426        | 387            | 0.7439 | 404                     | 0.6500           |
|               | flu        | 447        | 410            | 0.7205 | 434                     | 0.5071           |
| <b>3ac</b>    | abs        | 457        | 430            | 0.5785 | 452                     | 0.4327           |
|               | flu        | 521        | 489            | 0.3933 | 545                     | 0.2278           |
| <b>6a</b>     | abs        | 500        | 488            | 1.1948 | 526                     | 1.0633           |
|               | flu        | 594        | 520            | 1.2776 | 552<br>895 <sup>a</sup> | 1.0173<br>0.0000 |
| <b>3ab</b>    | abs        | 448        | 439            | 0.6547 | 518                     | 0.3756           |
|               | flu        | 492/702    | 505            | 0.5520 | 762 <sup>a</sup>        | 0.0000           |

<sup>a</sup> dark conformer (see Figs.S7 and S8)

Table S2. Summary of experimental and calculated (using the TD O3LYP/6-31G(d,p) method) absorption and fluorescence energies in solvents of different polarity: toluene, DCM, and DMSO. All values in [nm]. The calculated

values characterize structures previously optimized in the ground states  $S_0$  and the lowest electronically excited  $S_1$ , respectively.

| <b>TOLUE</b> |         |         |         |         | cal |  |
|--------------|---------|---------|---------|---------|-----|--|
| <b>NE</b>    |         |         |         |         |     |  |
|              | abs-exp | abs-cal | flu-exp | flu-cal |     |  |
| <b>2b</b>    | 449     | 401     | 464     | 468     |     |  |
| <b>2a</b>    | 441     | 395     | 457     | 454     |     |  |
| <b>2c</b>    | 467     | 419     | 486     | 511     |     |  |
| <b>2e</b>    | 457     | 420     | 467     | 455     |     |  |
| <b>2f</b>    | 436     | 401     | 450     | 479     |     |  |
| <b>2i</b>    | 454     | 425     | 480     | 537     |     |  |
| <b>4a</b>    | 428     | 388     | 444     | 432     |     |  |
| <b>3aa</b>   | 452     | 420     | 480     | 507     |     |  |
| <b>3ac</b>   | 454     | 437     | 501     | 555     |     |  |
| <b>3ab</b>   | 452     | 472     | 477     | 680     |     |  |
| <b>DCM</b>   |         |         |         |         | cal |  |
|              |         |         |         |         |     |  |
| <b>2b</b>    | 449     | 416     | 470     | 468     |     |  |
| <b>2a</b>    | 446     | 410     | 464     | 458     |     |  |
| <b>2c</b>    | 468     | 434     | 494     | 511     |     |  |
| <b>2e</b>    | 456     | 435     | 470     | 470     |     |  |
| <b>2f</b>    | 436     | 416     | 458     | 486     |     |  |
| <b>2i</b>    | 446     | 435     | 485     | 508     |     |  |
| <b>4a</b>    | 426     | 400     | 448     | 432     |     |  |
| <b>3aa</b>   | 453     | 431     | 490     | 500     |     |  |
| <b>3ac</b>   | 457     | 447     | 514     | 547     |     |  |
| <b>3ab</b>   | 452     | 505     | 642     | 736     |     |  |
| <b>6a</b>    | 509     | 526     | 575     | 563     |     |  |
| <b>DMSO</b>  |         |         |         |         | cal |  |
|              |         |         |         |         |     |  |
| <b>2b</b>    | 449     | 422     | 481     | 470     |     |  |
| <b>2a</b>    | 444     | 417     | 475     | 460     |     |  |
| <b>2c</b>    | 466     | 440     | 503     | 512     |     |  |
| <b>2e</b>    | 456     | 441     | 478     | 476     |     |  |
| <b>2f</b>    | 437     | 422     | 473     | 490     |     |  |
| <b>2i</b>    | 448     | 440     | 493     | 502     |     |  |
| <b>4a</b>    | 426     | 404     | 447     | 434     |     |  |
| <b>3aa</b>   | 451     | 437     | 501     | 500     |     |  |
| <b>3ac</b>   | 457     | 452     | 521     | 545     |     |  |
| <b>3ab</b>   | 448     | 518     | 702     | 762     |     |  |
| <b>6a</b>    | 500     | 526     | 594     | 552     |     |  |

Table S3. Values of the calculated dipole moments (in [D]) in the ground  $S_0$  and excited  $S_1$  states of the molecules in DMSO.

|            | $\mu(S_0)$ | $\mu(S_1)$ |
|------------|------------|------------|
| <b>2b</b>  | 9.6        | 12.0       |
| <b>2a</b>  | 10.0       | 12.5       |
| <b>2c</b>  | 9.7        | 12.2       |
| <b>2e</b>  | 9.7        | 10.6       |
| <b>2f</b>  | 9.7        | 13.9       |
| <b>2i</b>  | 15.1       | 17.1       |
| <b>4a</b>  | 9.9        | 11.2       |
| <b>3aa</b> | 13.1       | 13.7       |
| <b>3ac</b> | 9.7        | 13.7       |
| <b>3ab</b> | 13.4       | 31.7       |
| <b>6a</b>  | 22.3       | 15.5       |

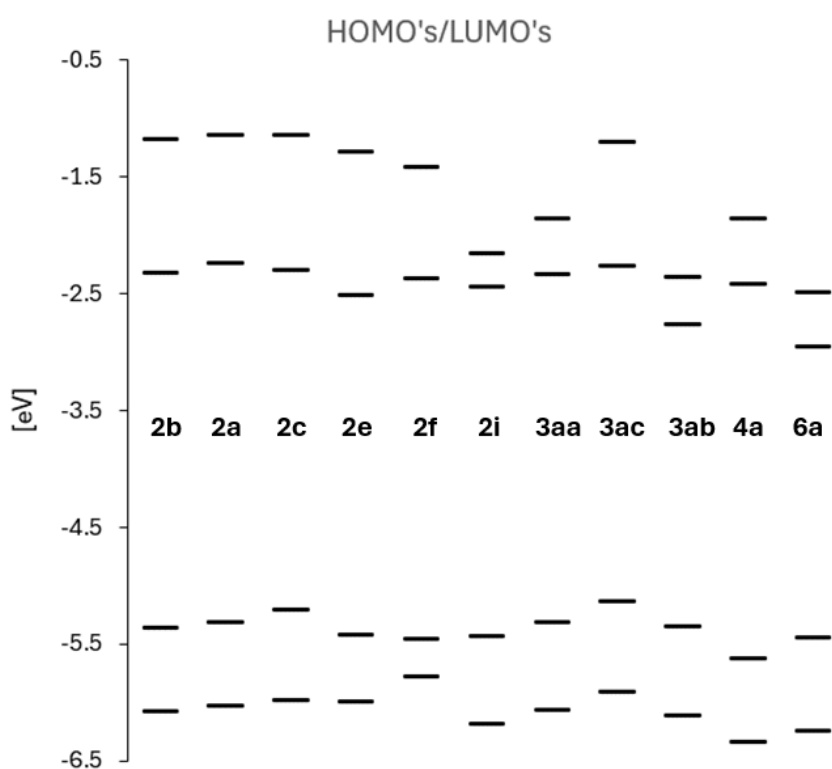

Figure S1. Energies of four frontier orbitals (HOMO-1, HOMO, LUMO, LUMO+1) for the molecules of the studied group. In each case, Substitution 2b leads to shifts of all rungs in the corresponding ladders.

Table S4. Tested compounds ranked according to HOMO (part A) and LUMO (part B) energies [all data in eV]. Part C – Values of  $\Delta_H = \text{HOMO} - \text{HOMO}(2b)$  and  $\Delta_L = \text{LUMO} - \text{LUMO}(2b)$  for individual molecules

| A         | HOMO         | $\Delta_H = \text{HOMO} - \text{HOMO}(2b)$ | LUMO  |
|-----------|--------------|--------------------------------------------|-------|
| 4a        | -5.62        | -0.26                                      | -2.42 |
| 2f        | -5.46        | -0.10                                      | -2.38 |
| 6a        | -5.44        | -0.08                                      | -2.95 |
| 2i        | -5.43        | -0.07                                      | -2.45 |
| 2e        | -5.42        | -0.06                                      | -2.51 |
| <b>2b</b> | <b>-5.36</b> | <b>0.00</b>                                | -2.33 |
| 3ab       | -5.35        | 0.01                                       | -2.77 |
| 2a        | -5.31        | 0.05                                       | -2.24 |
| 3aa       | -5.31        | 0.05                                       | -2.34 |
| 2c        | -5.21        | 0.15                                       | -2.29 |
| 3ac       | -5.14        | 0.22                                       | -2.26 |

| B         | HOMO         | LUMO         | $\Delta_L = \text{LUMO} - \text{LUMO}(2b)$ |
|-----------|--------------|--------------|--------------------------------------------|
| 6a        | -5.44        | -2.95        | -0.62                                      |
| 3ab       | -5.35        | -2.77        | -0.44                                      |
| 2e        | -5.42        | -2.51        | -0.19                                      |
| 2i        | -5.43        | -2.45        | -0.12                                      |
| 4a        | -5.62        | -2.42        | -0.09                                      |
| 2f        | -5.46        | -2.38        | -0.05                                      |
| 3aa       | -5.31        | -2.34        | -0.01                                      |
| <b>2b</b> | <b>-5.36</b> | <b>-2.33</b> | <b>0.00</b>                                |
| 2c        | -5.21        | -2.29        | 0.03                                       |
| 3ac       | -5.14        | -2.26        | 0.07                                       |
| 2a        | -5.31        | -2.24        | 0.09                                       |

| C         | $\Delta_H$  | $\Delta_L$  |
|-----------|-------------|-------------|
| 2a        | 0.05        | 0.09        |
| 3ac       | 0.22        | 0.07        |
| 2c        | 0.15        | 0.03        |
| <b>2b</b> | <b>0.00</b> | <b>0.00</b> |
| 3aa       | 0.05        | -0.01       |
| 2f        | -0.10       | -0.05       |
| 4a        | -0.26       | -0.09       |
| 2i        | -0.07       | -0.12       |
| 2e        | -0.06       | -0.19       |
| 3ab       | 0.01        | -0.44       |
| 6a        | -0.08       | -0.62       |

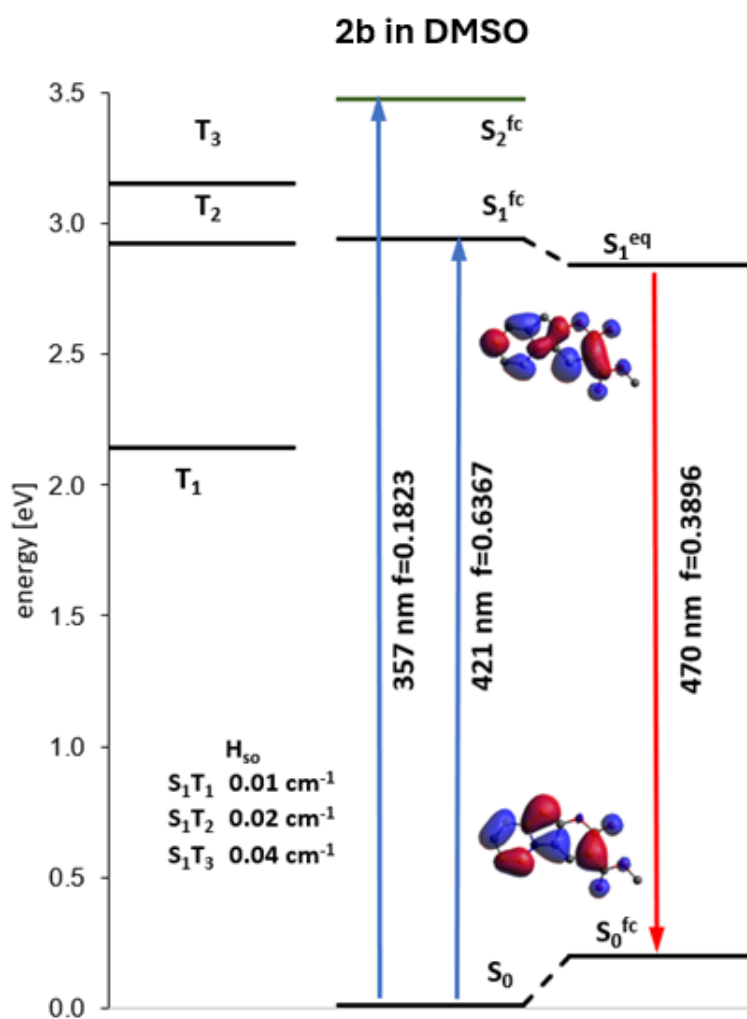

Figure S2. Diagram of the electronic states of **2b** in DMSO. The states  $S_0$ ,  $S_1^{eq}$  correspond to the energy minimum. States marked with “fc” are the final (Franck-Condon) states in vertical absorption and fluorescence. Next to the arrows corresponding to these transitions, the energy and oscillator strength values that characterize them are given. The shapes of HOMO and LUMO orbitals, describing transition between  $S_0$  and  $S_1$  states are shown. The interactions between the  $S_1$  state and the lowest triplet  $T_i$  states are described by small value SOC elements. The energy change in the relaxation process  $S_1^{fc} \rightsquigarrow S_1^{eq}$  is  $\sim 0.1$  eV. This process takes place in the excited state but in essence it is the adaptation of the molecular structure of the  $S_0$  state to the new charge distribution created by the excitation. The small changes in the geometry are also reflected by the calculated vibrational structure of the **2b** fluorescence spectrum (next Fig. S3) built on a framework of Franck-Condon factors with small values.

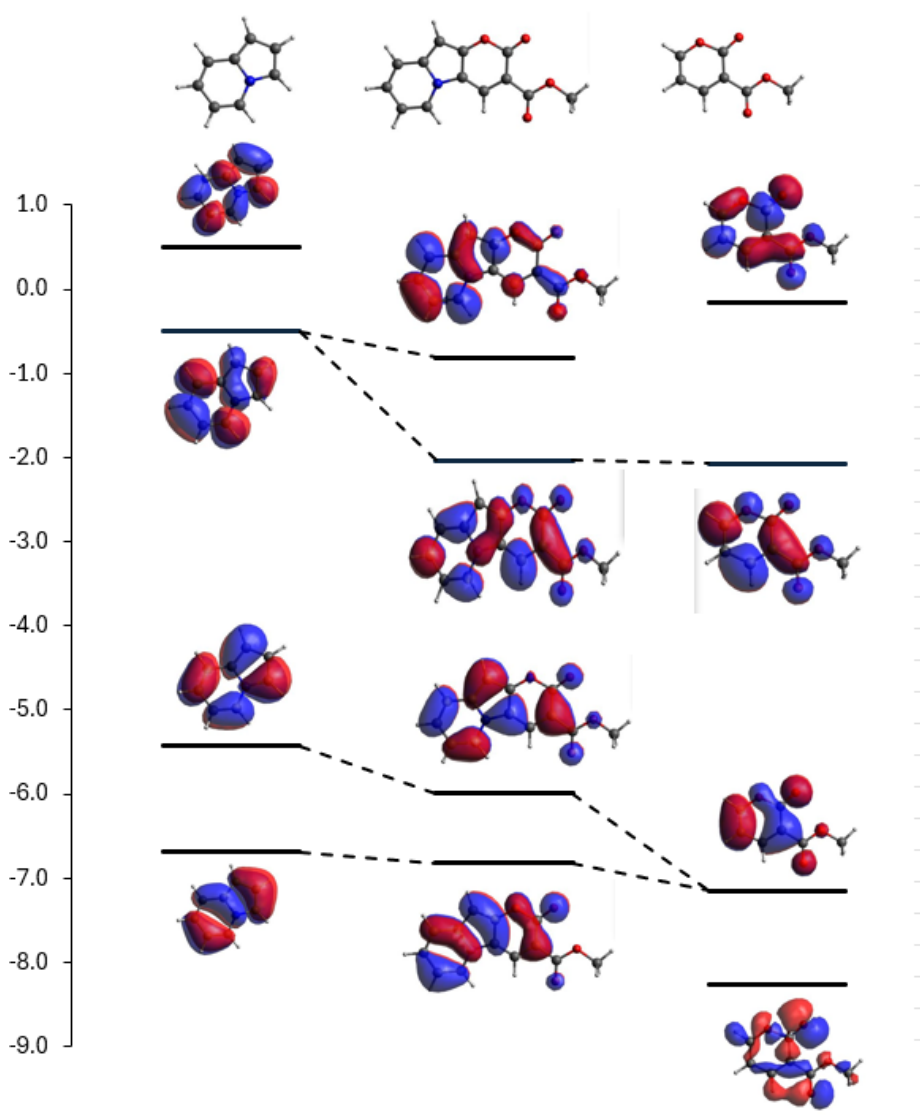

| TD DFT M06/6-31G(d,p)/ DFT M06/6-31G(d,p) |                      |                  |
|-------------------------------------------|----------------------|------------------|
| DMSO                                      |                      |                  |
| IND                                       | <b>2b</b> = IND-COUM | COUM             |
| 3.782 eV f=0.105                          | 3.045 eV f=0.742     | 4.065 eV f=0.320 |
|                                           |                      |                  |

Figure S3. **2b** as a combination of indolizine and coumarin frontier orbitals. Absorption energies and oscillator strengths. Transition moment vectors

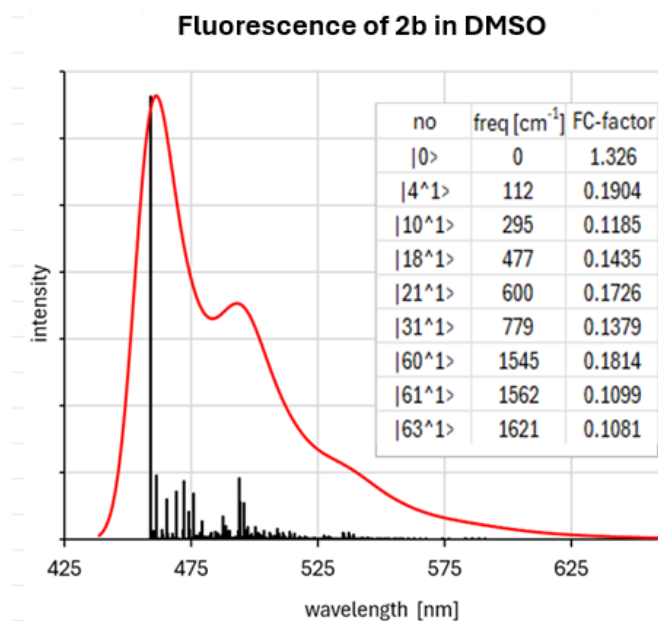

Figure S4. Simulation of **2b** fluorescence spectrum in DMSO. The attached table shows the values of the Franck-Condon factors for most active vibrational modes. The corresponding lines have been widened with  $fwch = 200 \text{ cm}^{-1}$ . The simulated spectrum reproduces the experimental spectrum well.

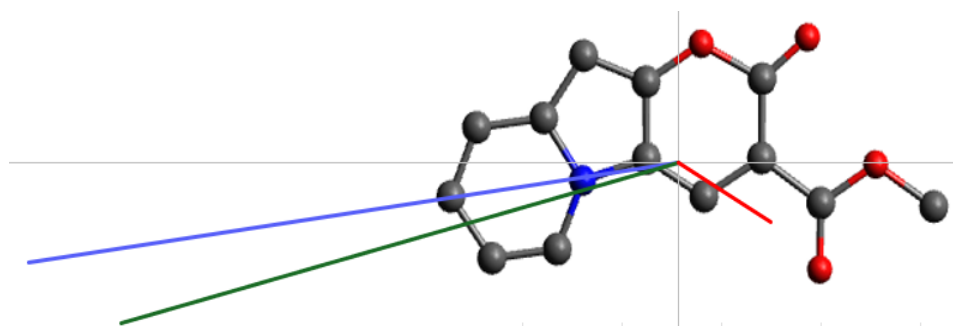

Figure S5. The directions of the dipole moment vectors in the ground state  $\mu(S_0)$  (green), the excited state  $\mu(S_1)$  (blue) and the direction of vector their vector difference  $\Delta\mu = \mu(S_1) - \mu(S_0)$  (red). According to the classical theory of the solvent effect,<sup>60</sup> the absorption and fluorescence energies in solvent, described by dielectric constant  $\epsilon$ , are given as:

$$E_{abs}(\epsilon) = E_{abs}(isol) - \alpha\mu(S_0) \Delta\mu f(\epsilon)$$

$$E_{flu}(\epsilon) = E_{flu}(isol) - \alpha\mu(S_1) \Delta\mu f(\epsilon)$$

where  $E_{abs}(isol)$  and  $E_{flu}(isol)$  are absorption and fluorescence energies of isolated molecule,  $\alpha=const$ ,  $f(\epsilon)$  is solvent polarity function. Therefore, the shifts of absorption and fluorescence are dependent on the scalar products between two vectors  $\mu(S_0) \Delta\mu$  and  $\mu(S_1) \Delta\mu$ , respectively. The value of scalar products of two vectors is dependent on the cosine of the angle between these vectors. Hence, the angle between red vector ( $\Delta\mu$ ) and the blue vector ( $\mu(S_1)$ ) is large, then cosine is small and fluorescence shift is small and, according to this approach, the absorption shift is even smaller (described by products of the green and red vectors).



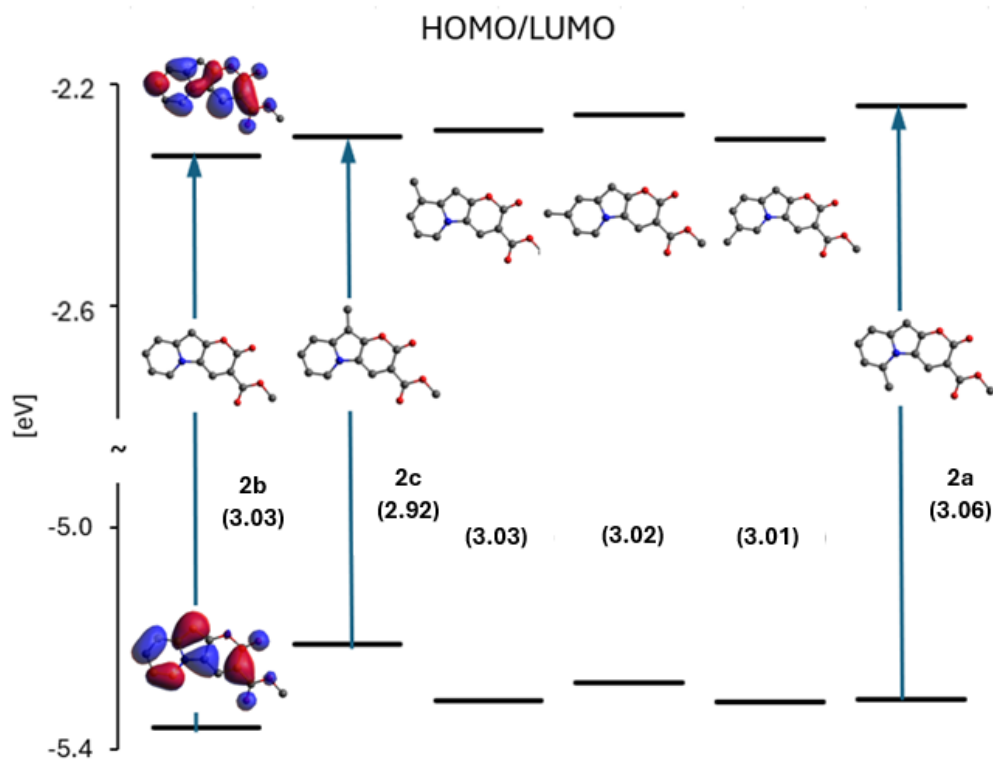

Figure S6. HOMO and LUMO energy changes with methylation of **2b** at different positions.

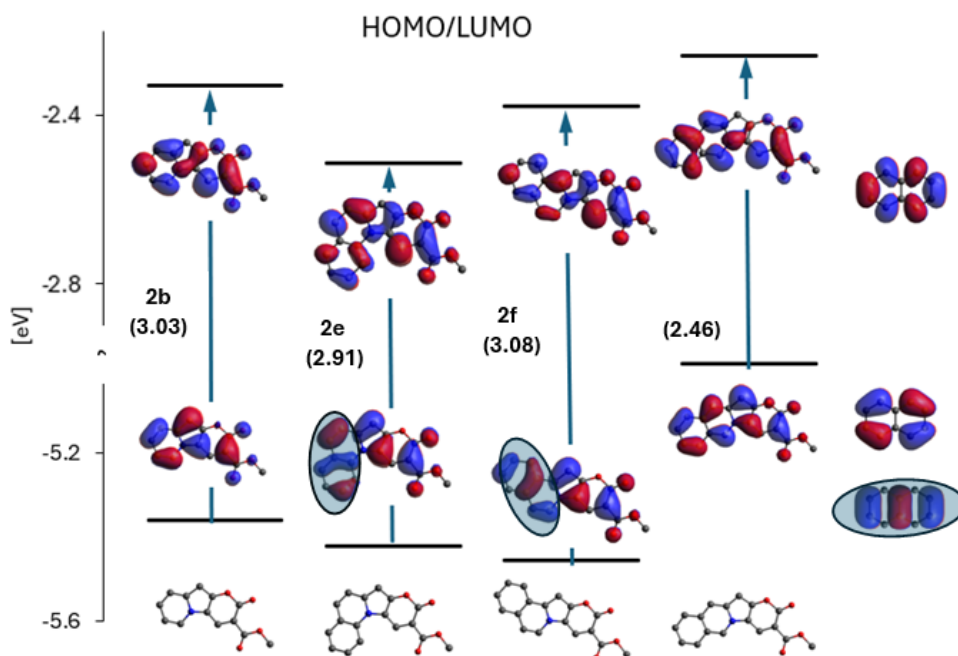

Figure S7. Changes in the energy and shape of HOMO and LUMO at different expansions **2b**. From a topological look at the shape of the orbitals, one can notice the deformed naphthalene part (isolated naphthalene orbitals on the right side) in the HOMO and LUMO of extended molecules. For the third possible expansion mode, the HOMO of molecule **2b** would mix with a different naphthalene orbital than in the previous cases.

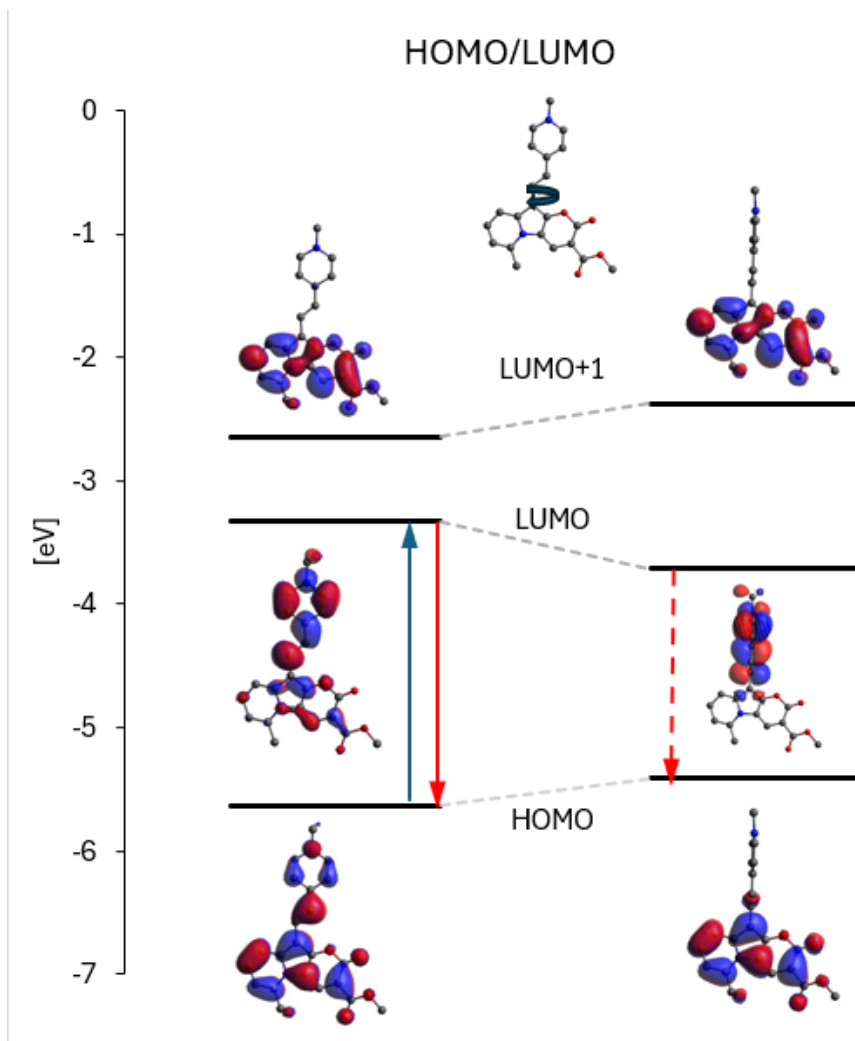

Figure S8. HOMO and LUMO of bright and dark forms of **6a**.

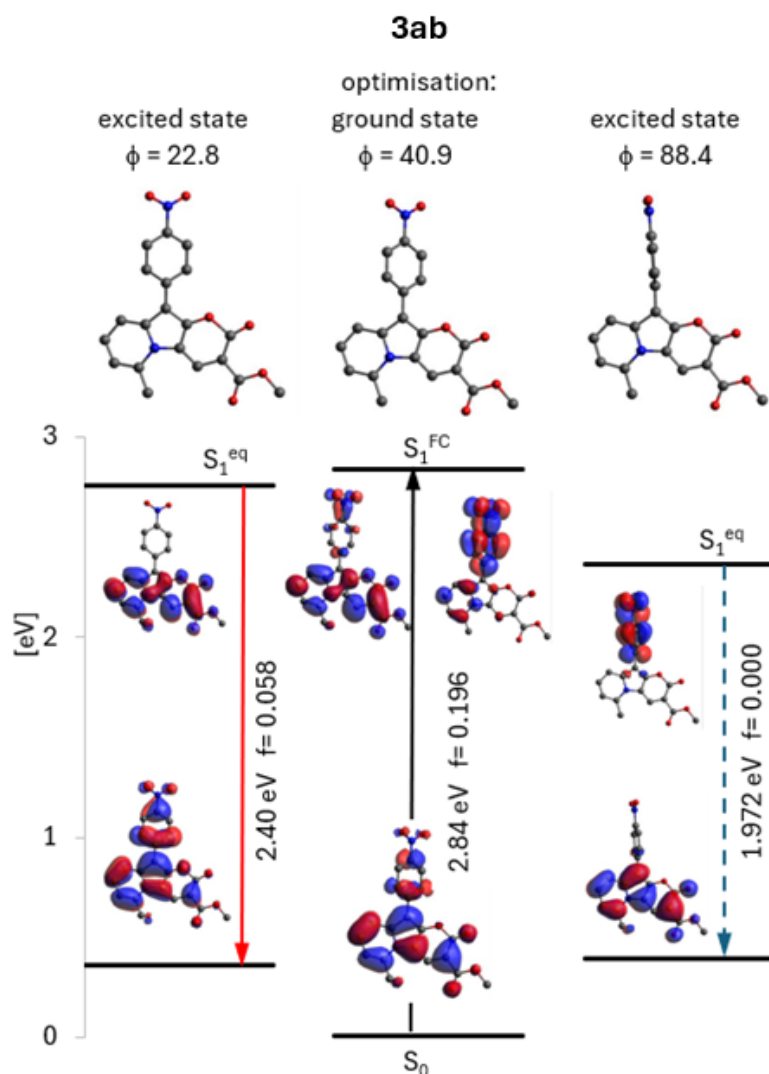

Figure S9. Electronic states of 3ab. (left and right) Energies and configurations of 3ab in two minima optimized in the electronically excited  $S_1$  state. (center) Energetics 3ab for geometry optimized in the  $S_0$  ground state. Electronic excitation leads to the  $S_1^{FC}$  state described by a combination of two electron configurations HOMO/LUMO(2b) and HOMO/LUMO'(sub). Relaxation of  $S_1^{FC}$  leads to two energy minima, corresponding to bright and dark form. The emission of bright form is the emission characteristic of the studied family of molecules. However, in the second minimum the molecule is in the dark state, as the oscillator strength is zero because of the lack of overlap between LUMO' and HOMO.

## 2. Photophysical Measurements

*Table S5. Photophysical data of synthesized 2-oxo-pyrano[2,3-b]indolizine derivatives*

| <b>Cmp</b>            | <b>Solv</b> | $\lambda_{\text{abs}}$<br>[nm] | $\lambda_{\text{em}}$<br>[nm] | $\Delta\bar{\nu}$<br>[cm <sup>-1</sup> ] | $\epsilon$<br>[M <sup>-1</sup> cm <sup>-1</sup> ] | $\Phi_{\text{fl}}$ |
|-----------------------|-------------|--------------------------------|-------------------------------|------------------------------------------|---------------------------------------------------|--------------------|
| <b>2a</b>             | DCM         | 446                            | 464                           | 900                                      | 30500                                             | 0,71               |
|                       | DMSO        | 444                            | 475                           | 1500                                     | 33100                                             | 0,73               |
|                       | Tol         | 441                            | 457                           | 800                                      | 39800                                             | 0,66               |
| <b>2b</b>             | DCM         | 449                            | 470                           | 1000                                     | 16300                                             | 0,77               |
|                       | DMSO        | 449                            | 481                           | 1500                                     | 17600                                             | 0,76               |
|                       | Tol         | 449                            | 464                           | 700                                      | 16000                                             | 0,69               |
| <b>2c</b>             | DCM         | 468                            | 494                           | 1100                                     | 22900                                             | 0.61               |
|                       | DMSO        | 466                            | 503                           | 1600                                     | 24100                                             | 0.60               |
|                       | Tol         | 467                            | 486                           | 800                                      | 20300                                             | 0.22               |
| <b>2d</b>             | DCM         | 467                            | 499                           | 1400                                     | 24600                                             | 0,64               |
|                       | DMSO        | 456                            | 507                           | 2200                                     | 17100                                             | 0,64               |
|                       | Tol         | 465                            | 487                           | 1000                                     | 8900                                              | 0,32               |
| <b>2e</b>             | DCM         | 456                            | 470                           | 700                                      | 39700                                             | 0,73               |
|                       | DMSO        | 456                            | 478                           | 1000                                     | 36300                                             | 0,78               |
|                       | Tol         | 457                            | 467                           | 500                                      | 35800                                             | 0,81               |
| <b>2f</b>             | DCM         | 436                            | 458                           | 1100                                     | 39700                                             | 0,33               |
|                       | DMSO        | 437                            | 473                           | 1700                                     | 36300                                             | 0,35               |
|                       | Tol         | 436                            | 450                           | 700                                      | 35800                                             | 0,41               |
| <b>2g</b>             | DCM         | 466                            | 500                           | 1500                                     | 17600                                             | 0,92               |
|                       | DMSO        | 456                            | 514                           | 2500                                     | 20900                                             | 0,66               |
|                       | Tol         | 469                            | 500                           | 1300                                     | 16700                                             | 0,46               |
| <b>2h</b>             | DCM         | 433                            | 452                           | 1000                                     | 29200                                             | 0,81               |
|                       | DMSO        | 430                            | 463                           | 1700                                     | 27600                                             | 0,81               |
|                       | Tol         | 434                            | 449                           | 800                                      | 23600                                             | 0,79               |
| <b>2i</b>             | DCM         | 446                            | 485                           | 1800                                     | 21000                                             | 0,25               |
|                       | DMSO        | 448                            | 493                           | 2000                                     | 22300                                             | 0,17               |
|                       | Tol         | 454                            | 480                           | 1200                                     | 19100                                             | 0,22               |
| <b>3aa</b>            | DCM         | 453                            | 490                           | 1700                                     | 22928                                             | 0,64               |
|                       | DMSO        | 451                            | 501                           | 2200                                     | 24269                                             | 0,75               |
|                       | Tol         | 452                            | 480                           | 1300                                     | 16484                                             | 0,58               |
| <b>3ab</b>            | DCM         | 452                            | 491/642                       | 6500                                     | 27700                                             | 0.03               |
|                       | DMSO        | 448                            | 492/702                       | 8100                                     | 20000                                             | <0.01              |
|                       | Tol         | 452                            | 477                           | 1200                                     | 30100                                             | 0.34               |
| <b>3ac</b>            | DCM         | 457                            | 514                           | 2400                                     | 19600                                             | 0,65               |
|                       | DMSO        | 457                            | 521                           | 2700                                     | 19300                                             | 0,60               |
|                       | Tol         | 454                            | 501                           | 2100                                     | 17000                                             | 0,58               |
| <b>4a</b>             | DCM         | 426                            | 448                           | 1200                                     | 31800                                             | 0,77               |
|                       | DMSO        | 426                            | 447                           | 1100                                     | 30400                                             | 0,78               |
|                       | Tol         | 428                            | 444                           | 800                                      | 28600                                             | 0,70               |
| <b>6a<sup>b</sup></b> | DCM         | 509                            | 575                           | 2300                                     | 24400                                             | 0.44               |
|                       | DMSO        | 490                            | 594                           | 3200                                     | 20400                                             | 0.37               |

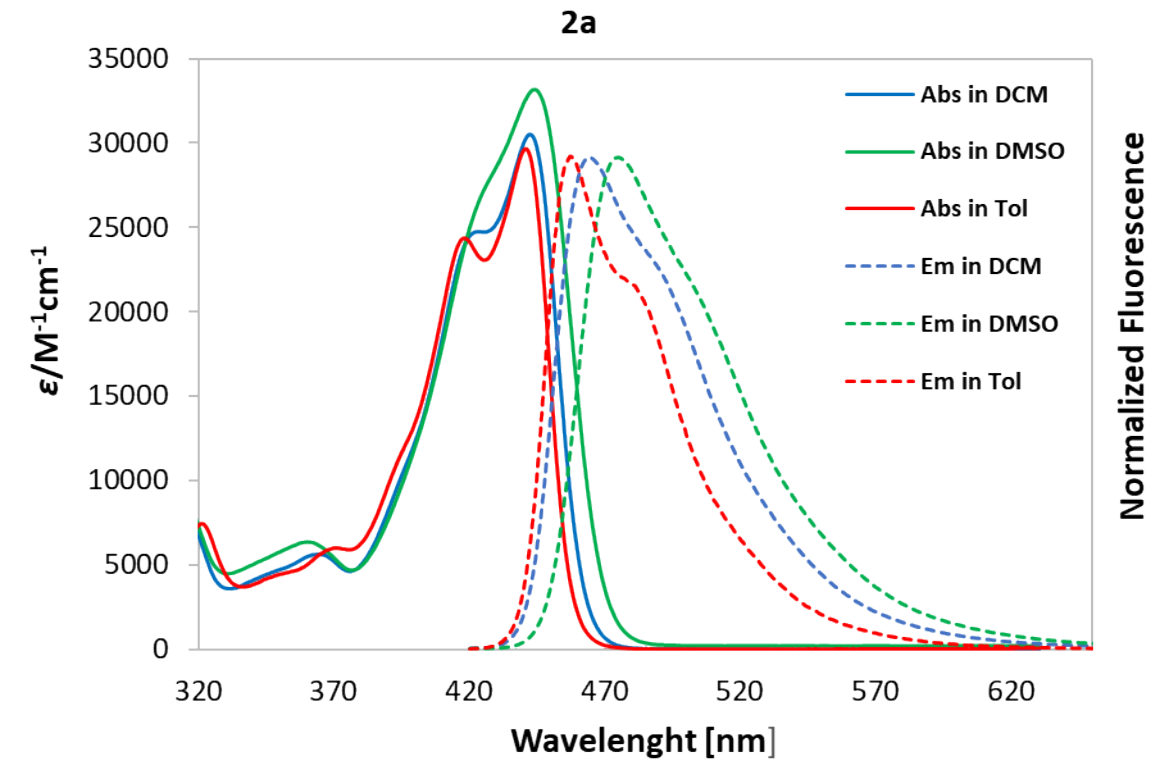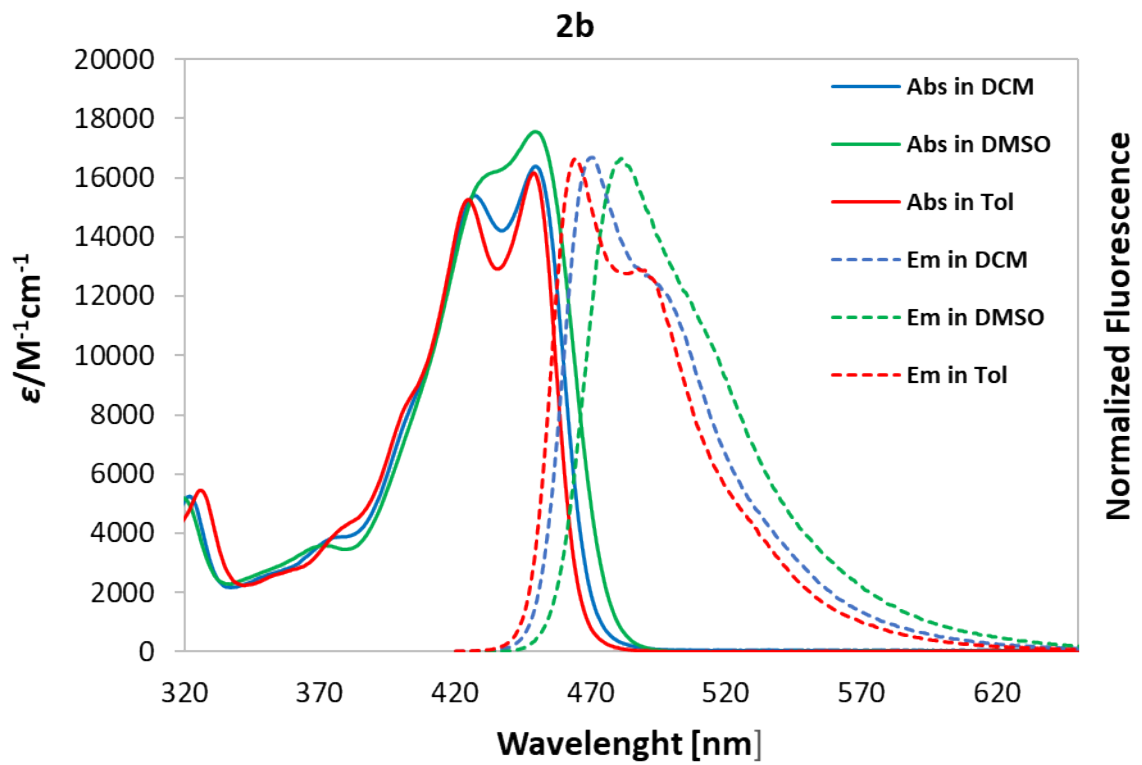

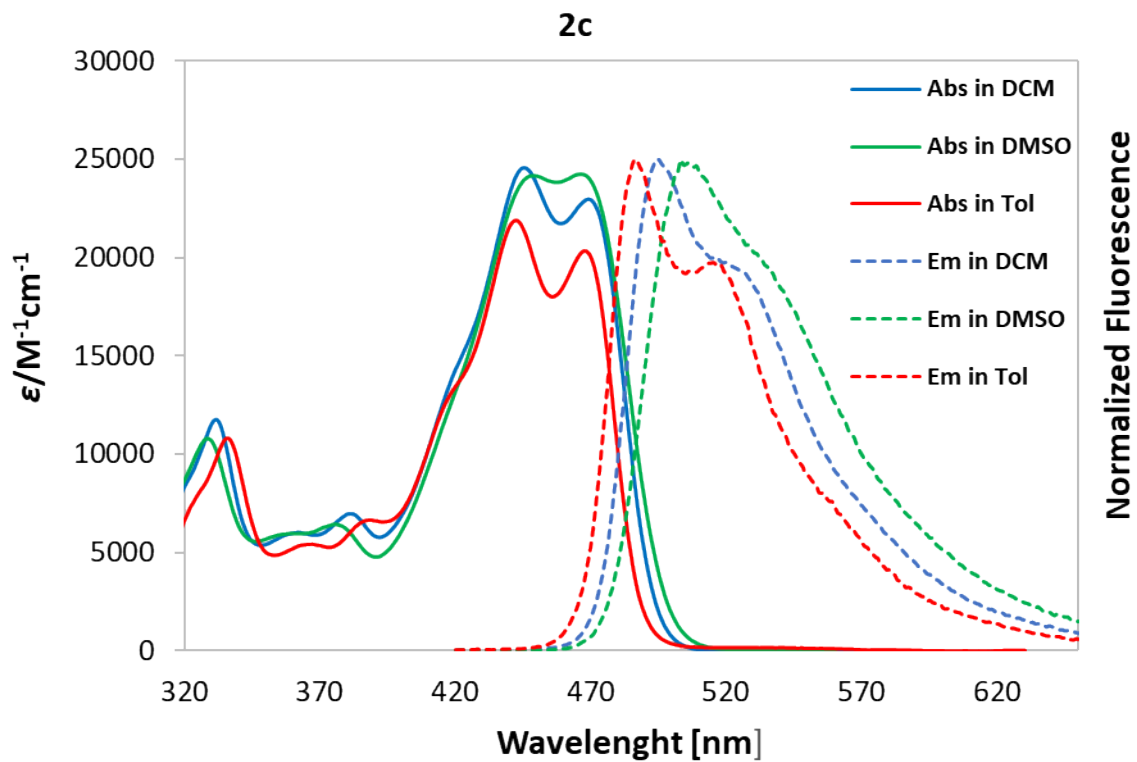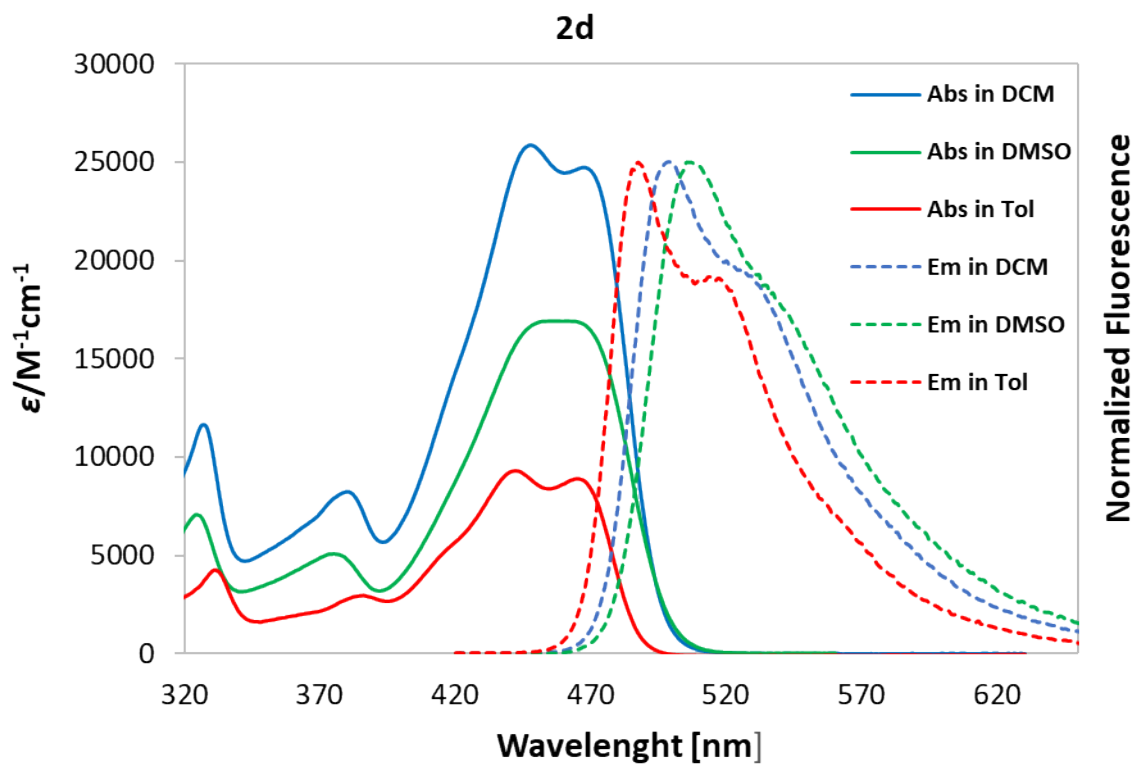

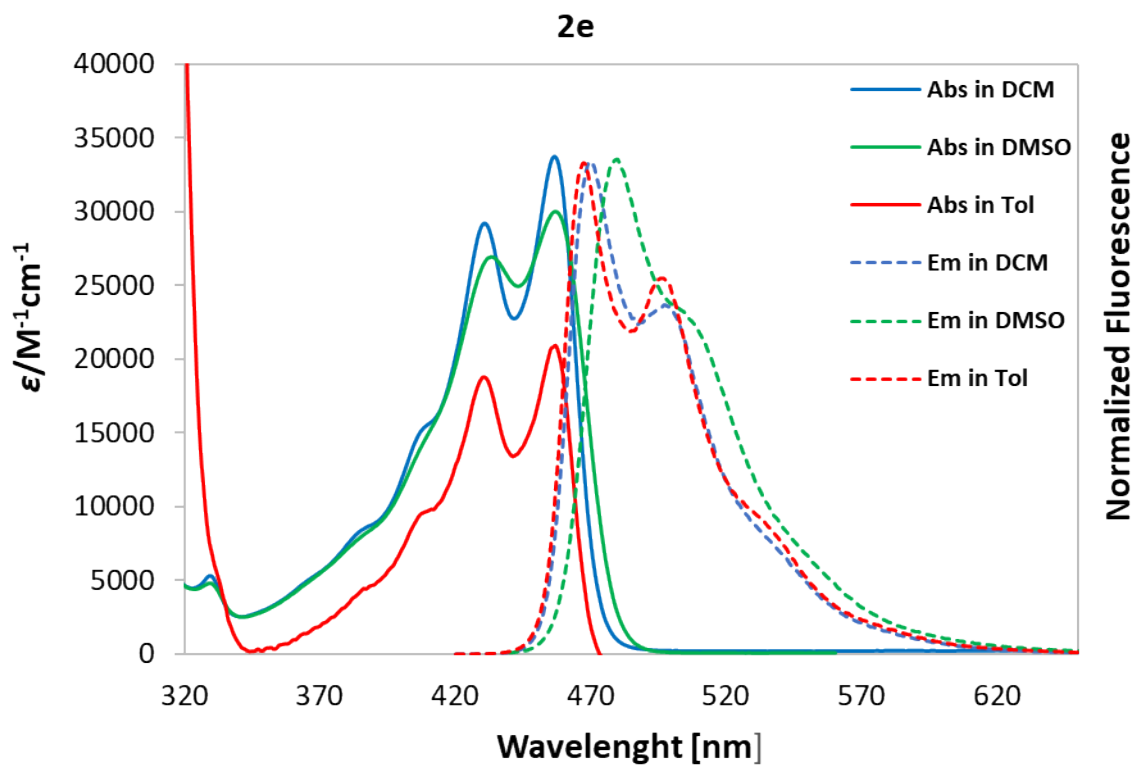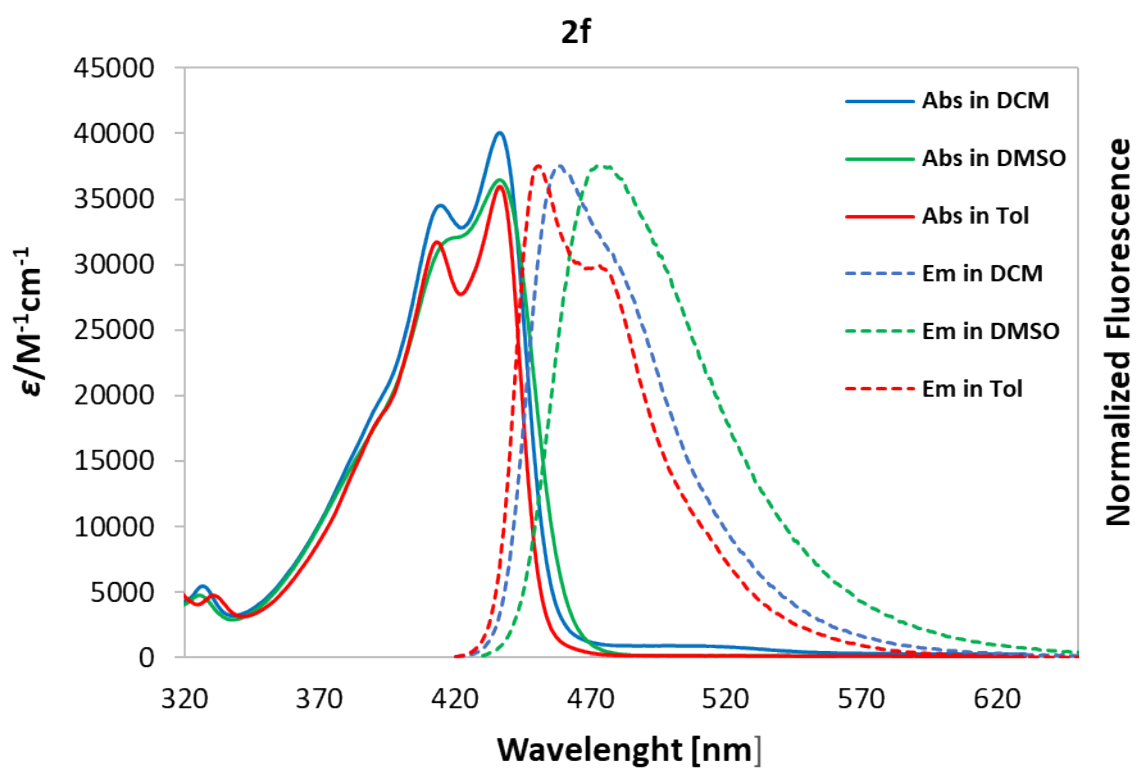

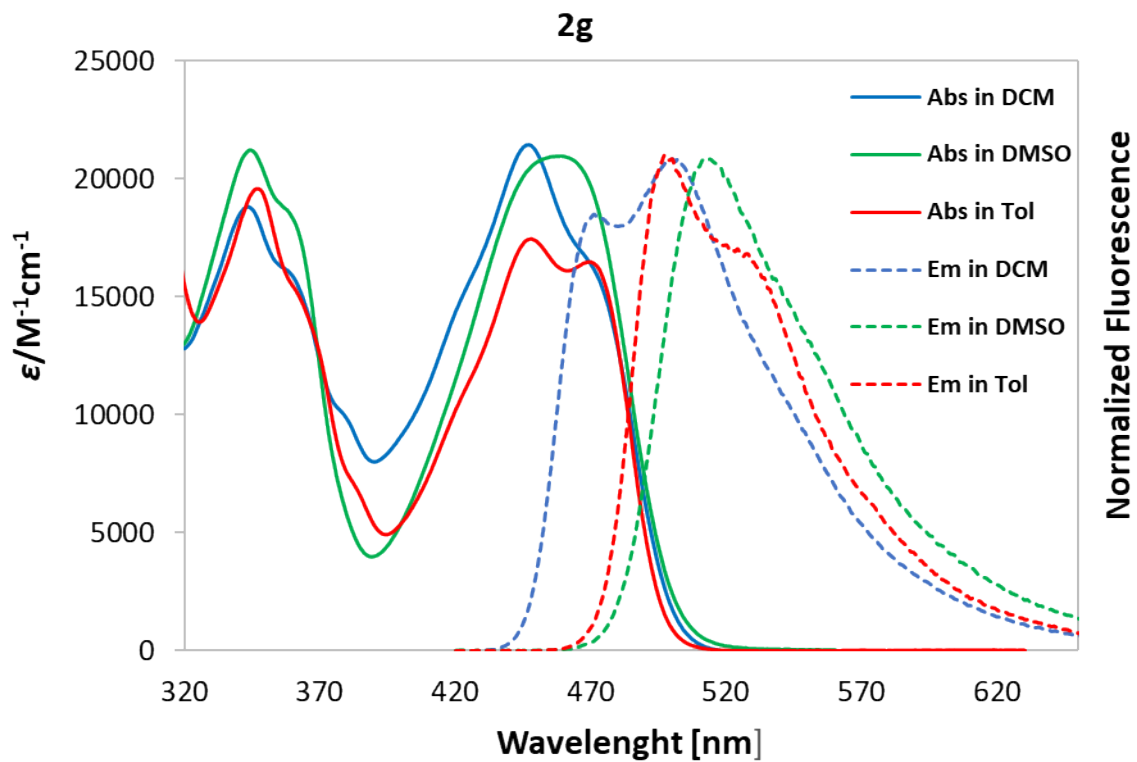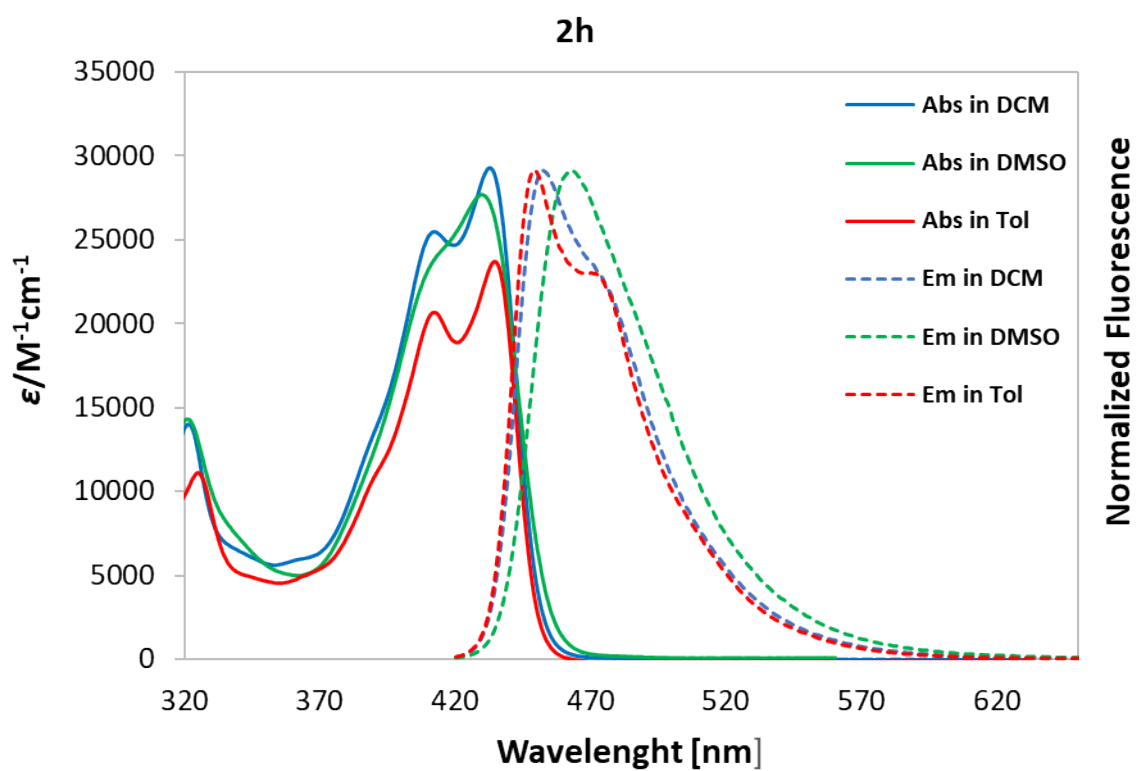



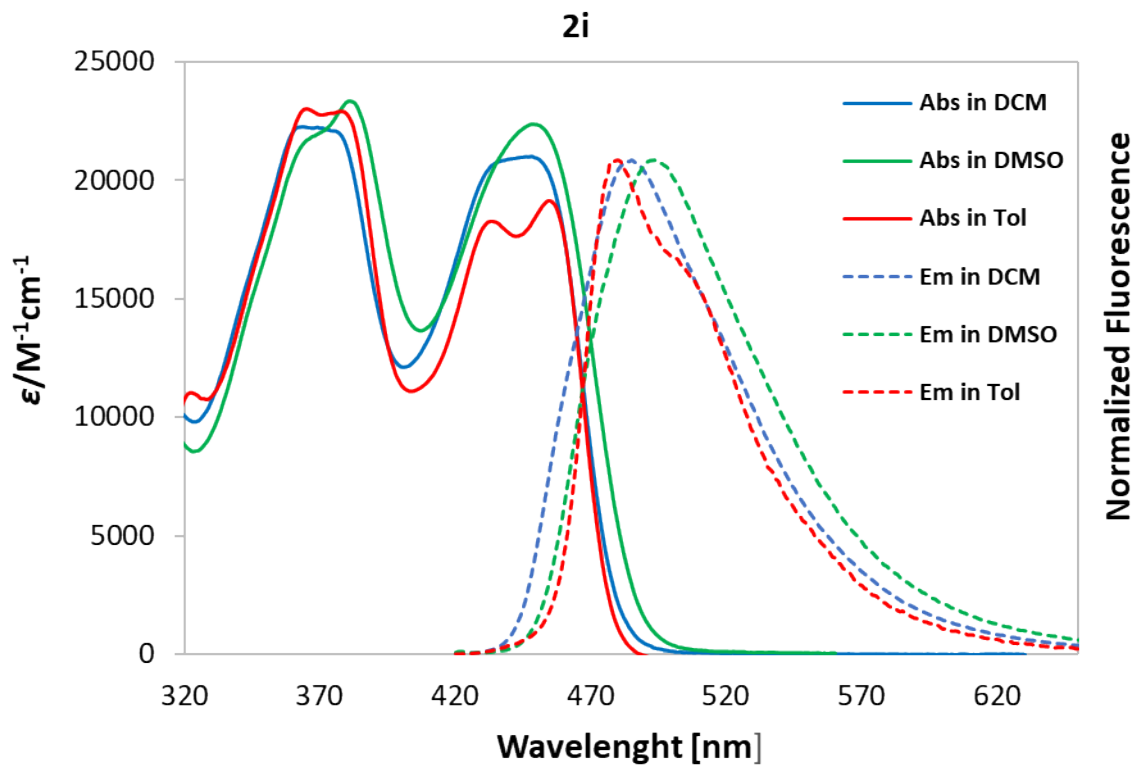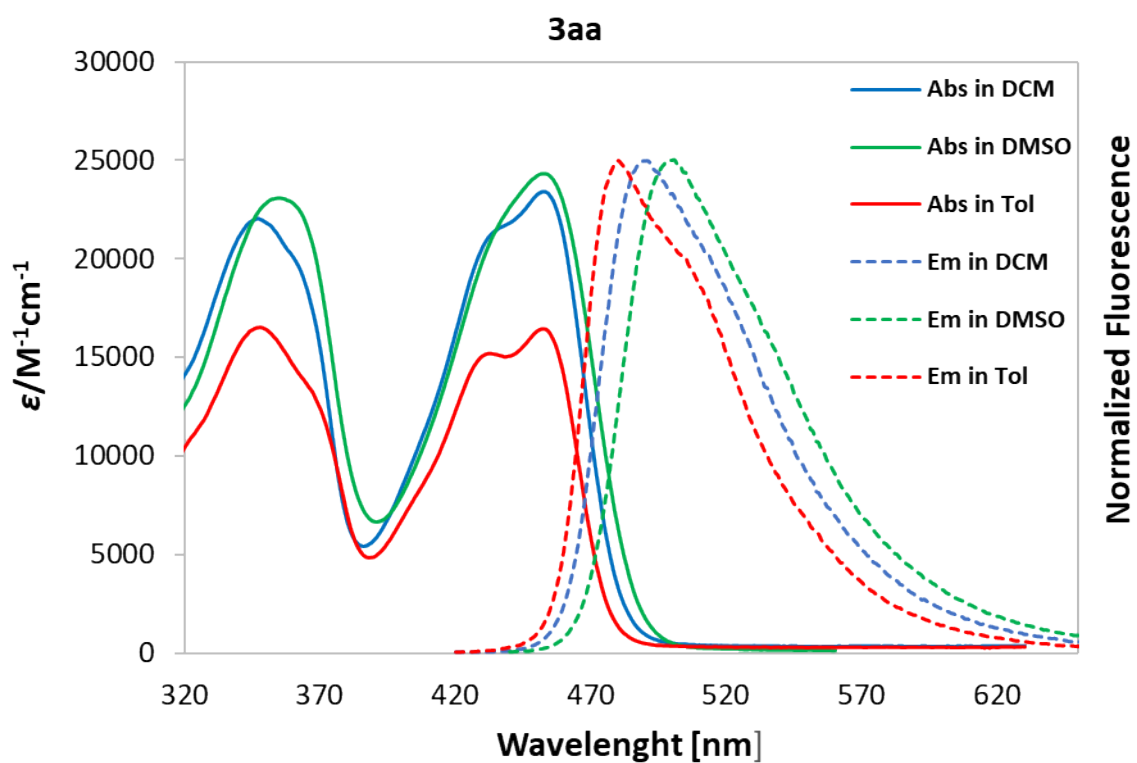

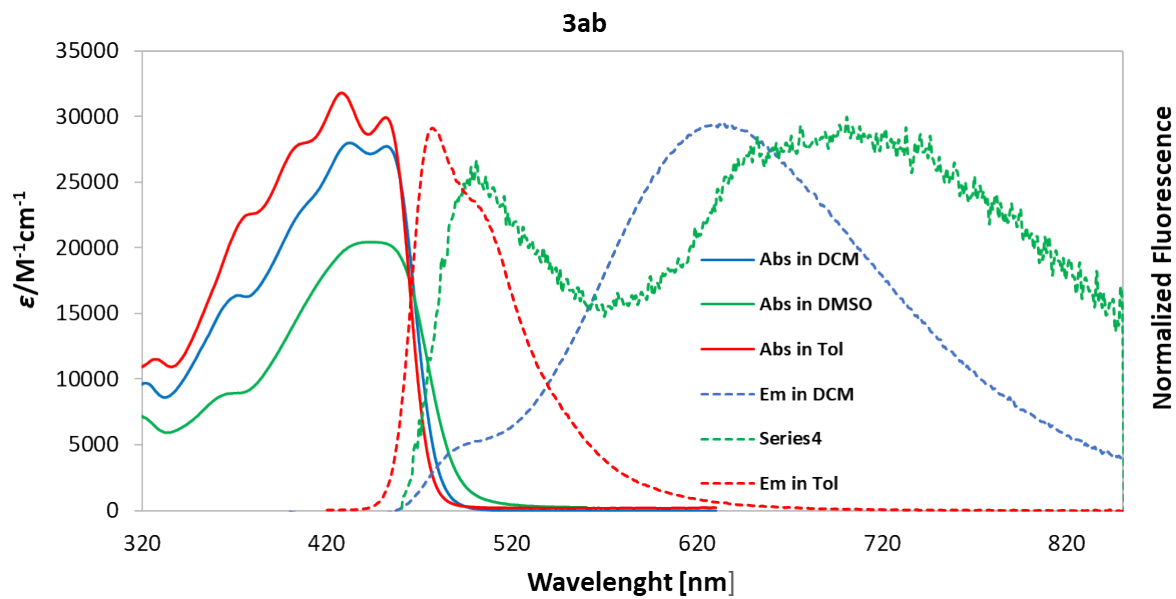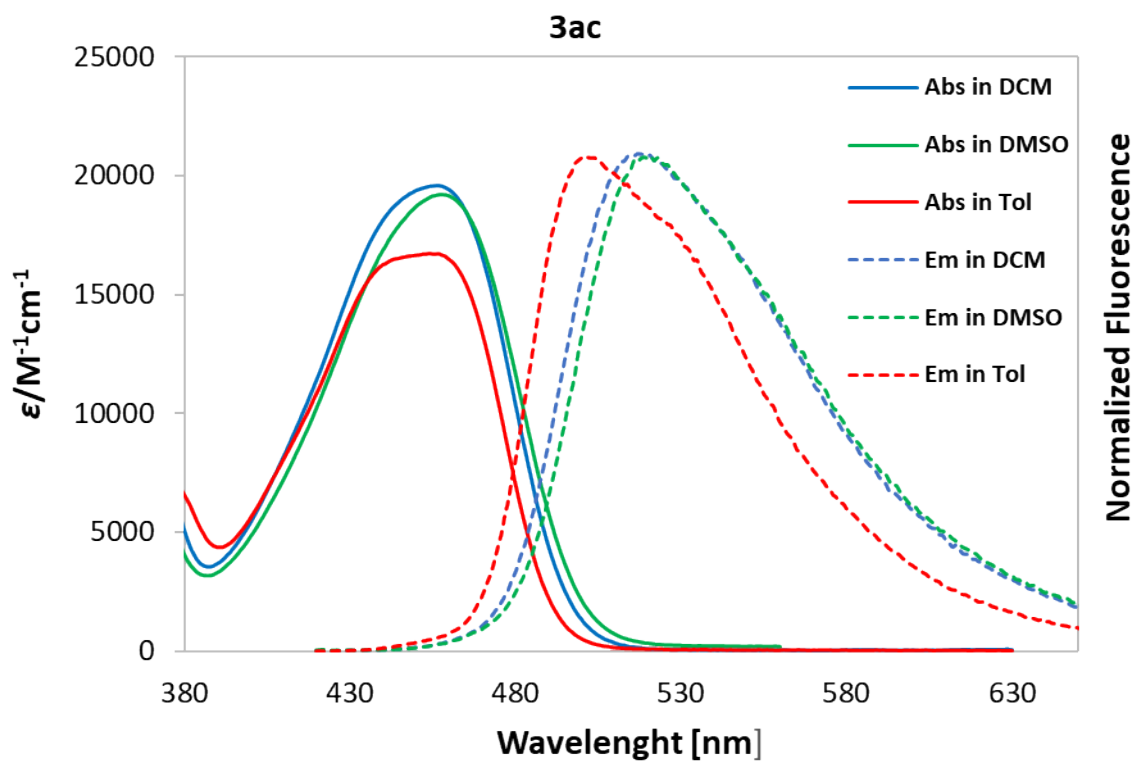

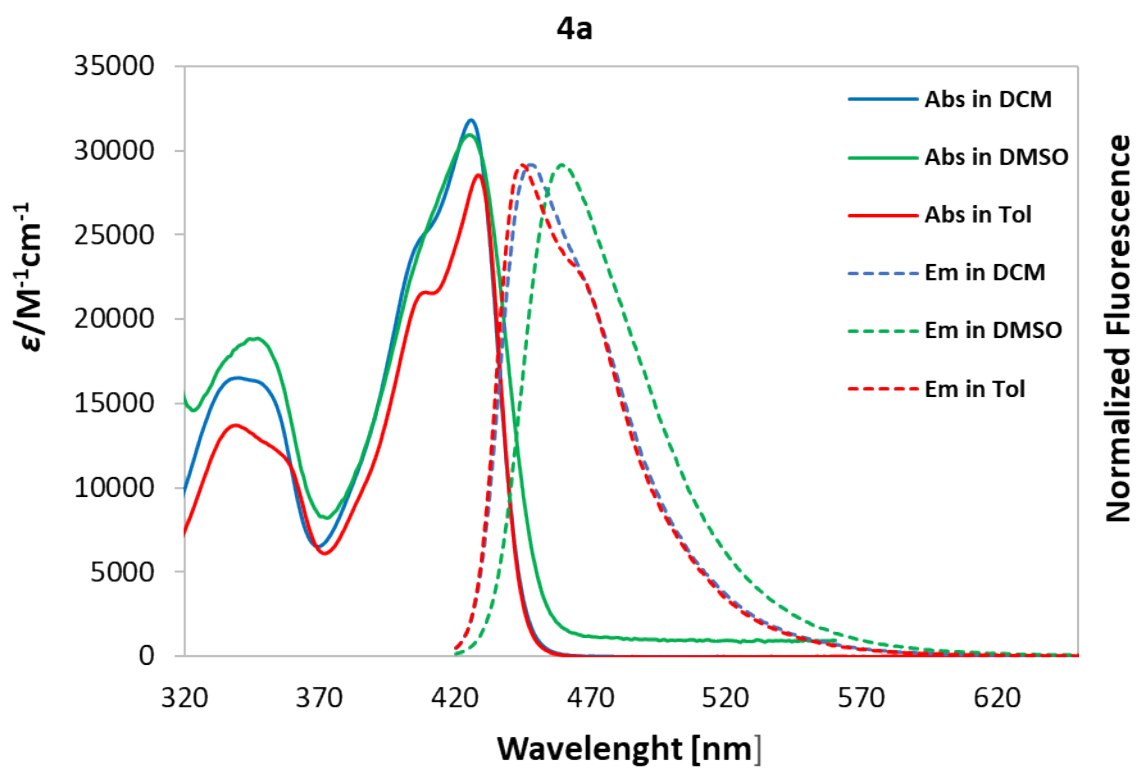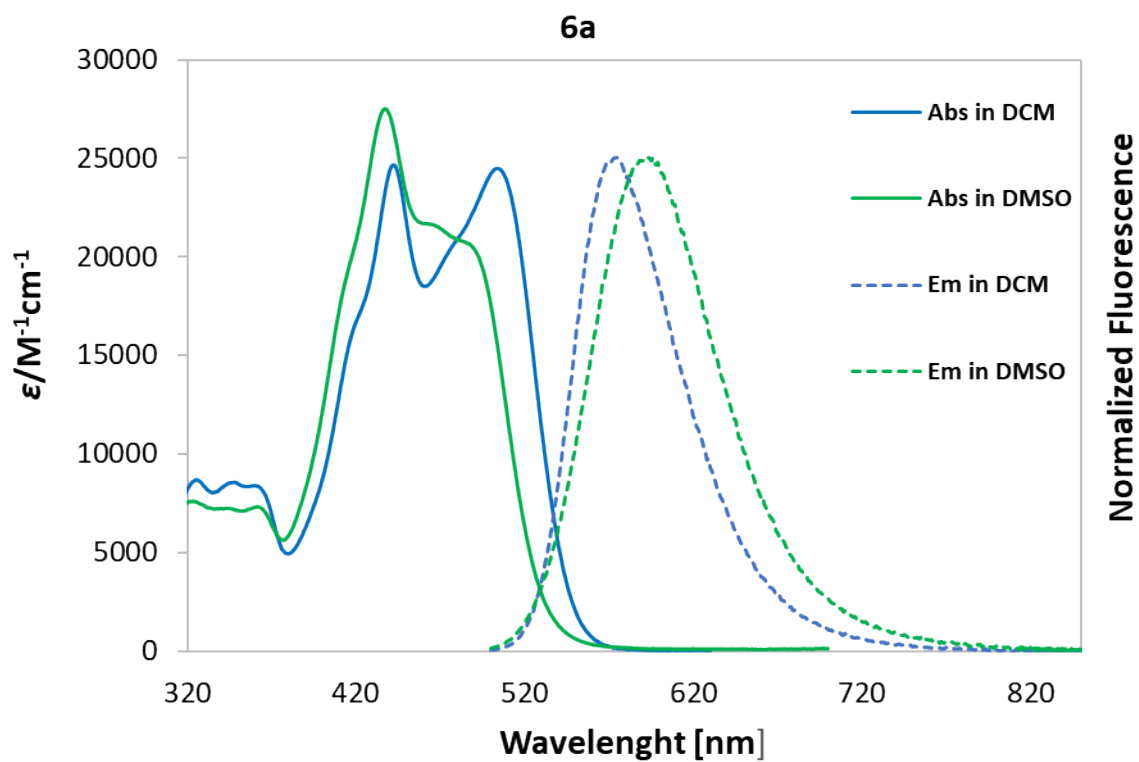

Figure S10. Absorption (solid) and fluorescence spectra (dashed lines) of compounds in solvents.

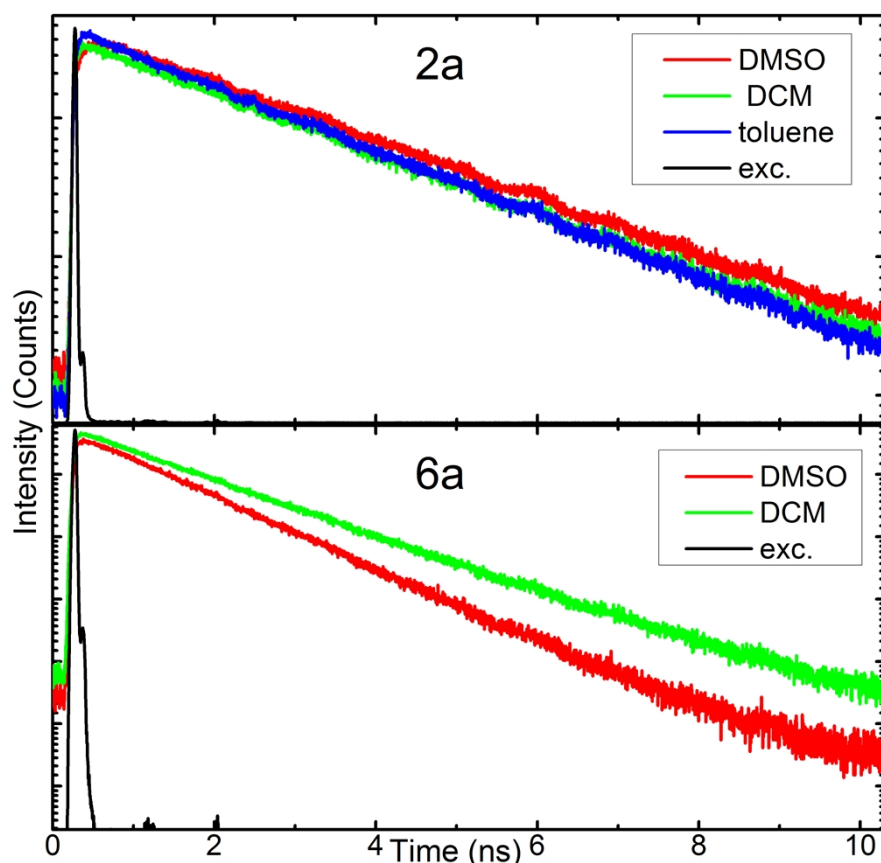

Figure S11. Semi logarithmic plot of fluorescence decay traces of **2a** (upper) and **6a** (bottom panel) in solvents. Decay curves recorded with resolution of 3.05 ps per channel at 20°C. Excitation at 387.5 nm.

Table S6. Fluorescence decay time  $\tau$  determined from decay profiles presented in Figure S11, quantum yield  $\Phi$  (copied from Table S5), radiative  $k_r$  and non-radiative  $k_{nr}$  rate constants as well as fluorescence excitation and observation wavelengths for **2a** and **6a** in solvents.  $k_r = \Phi/\tau$  and  $k_{nr} = 1/\tau - k_r$ .

| Compound  | Solvent | Exc./nm | Obs./nm | $\tau$ / ns | $\Phi$ | $k_r / 10^9 \text{ s}^{-1}$ | $k_{nr} / 10^9 \text{ s}^{-1}$ |
|-----------|---------|---------|---------|-------------|--------|-----------------------------|--------------------------------|
| <b>2a</b> | Toluene | 387.5   | 470     | 3.61        | 0.66   | 0.127                       | 0.15                           |
| <b>2a</b> | DCM     | 387.5   | 467     | 3.52        | 0.71   | 0.139                       | 0.14                           |
| <b>2a</b> | DMSO    | 387.5   | 467     | 3.86        | 0.73   | 0.132                       | 0.13                           |
| <b>6a</b> | DCM     | 387.5   | 578     | 2.1         | 0.44   | 0.21                        | 0.27                           |
| <b>6a</b> | DMSO    | 387.5   | 591     | 1.66        | 0.37   | 0.22                        | 0.38                           |

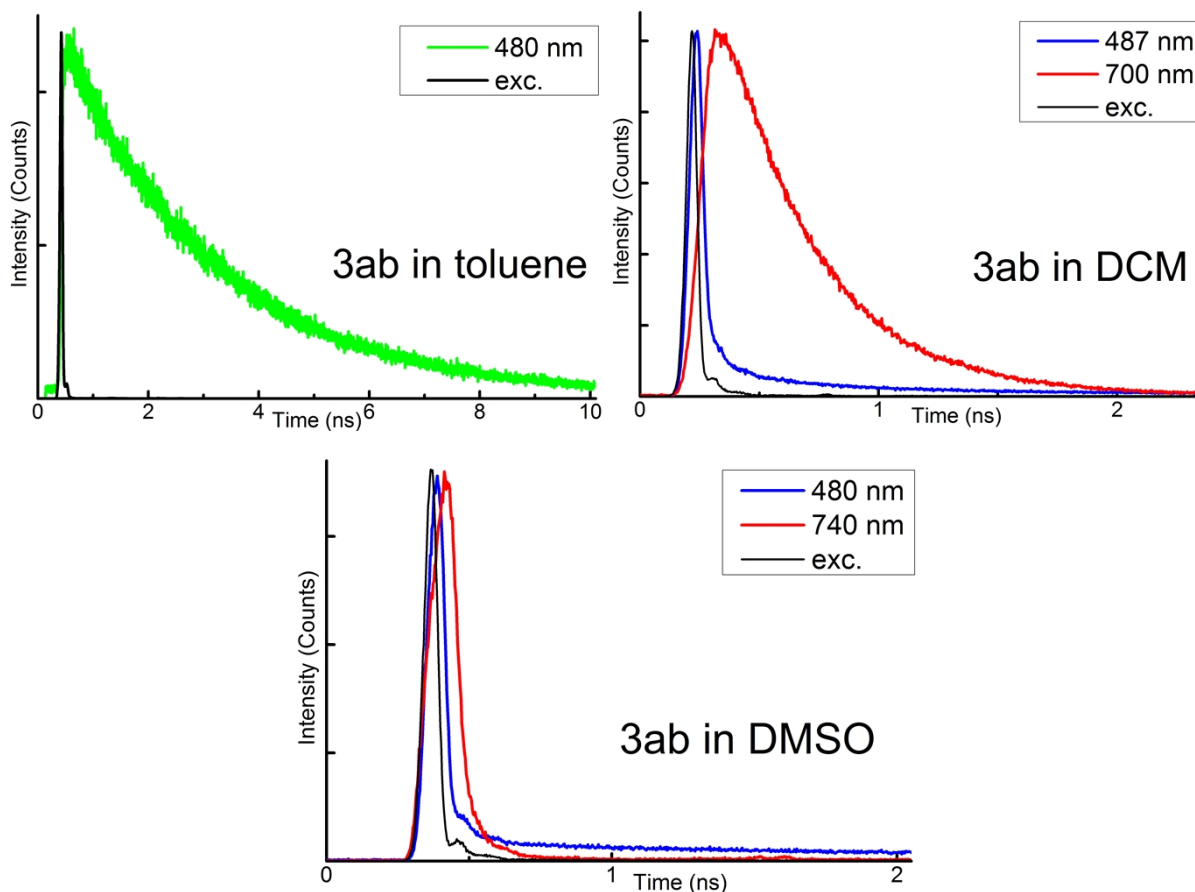

Figure S12. Plot of fluorescence decay traces of **3ab** in solvents: toluene (upper), dichloromethane (middle) and DMSO (bottom panel). Decay curves recorded with resolution of 3.05 ps per channel at temperature 20°C. Excitation at 387.5 nm. Legends specify wavelength of observation and color of traces.

Table S7. Fluorescence decay times,  $\tau$ , and amplitudes,  $A$ , obtained from decay profiles presented in Figure S12, Excitation at 387.5 nm. Radiative  $k_r$  and non-radiative  $k_{nr}$  rate constants are calculated for single – exponential decay in toluene only.

| Compound   | Solvent | Obs./nm | $\tau_1$ / ns | $\tau_2$ / ns | $A_1$ | $A_2$ | $\Phi$ | $k_r / 10^9 \text{ s}^{-1}$ | $k_{nr} / 10^9 \text{ s}^{-1}$ |
|------------|---------|---------|---------------|---------------|-------|-------|--------|-----------------------------|--------------------------------|
| <b>3ab</b> | Toluene | 480     | 2.62          |               |       |       | 0.34   | 0.088                       | 0.29                           |
| <b>3ab</b> | DCM     | 487     | 0.02          | 0.356         | 70.9  | 1.414 |        |                             |                                |
| <b>3ab</b> | DCM     | 700     | 0.055         | 0.356         | -15   | 18.7  |        |                             |                                |
| <b>3ab</b> | DMSO    | 480     | 0.015         | 2.22          | 86    | 0.63  |        |                             |                                |
| <b>3ab</b> | DMSO    | 740     | 0.055         |               |       |       |        |                             |                                |

### 3. Imaging Studies

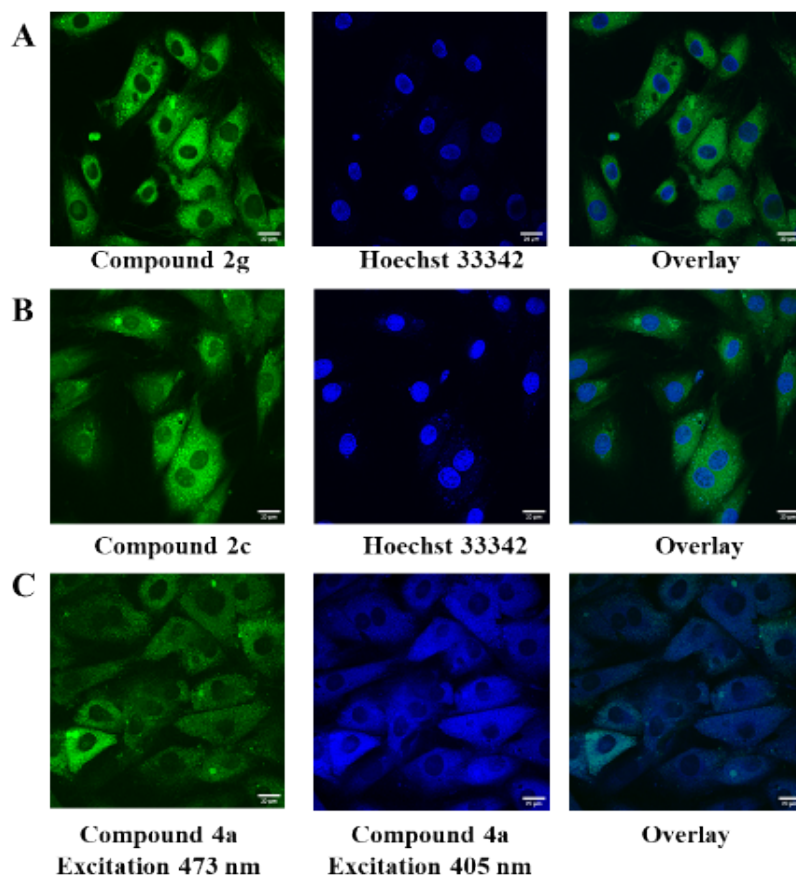

Figure S13. Intracellular localization of compound **2g**, **2c** and **4a** in H9c2 cells detected using confocal fluorescence microscopy. A) Intracellular localization of **2g** compound in relation to Hoechst 33342. B) Intracellular localization of **2c** compound in relation to Hoechst 33342. C) Intracellular localization of **4a** compound in two excitation wavelength and its Overlay.

## 4. <sup>1</sup>H NMR and <sup>13</sup>C NMR spectra of new compounds

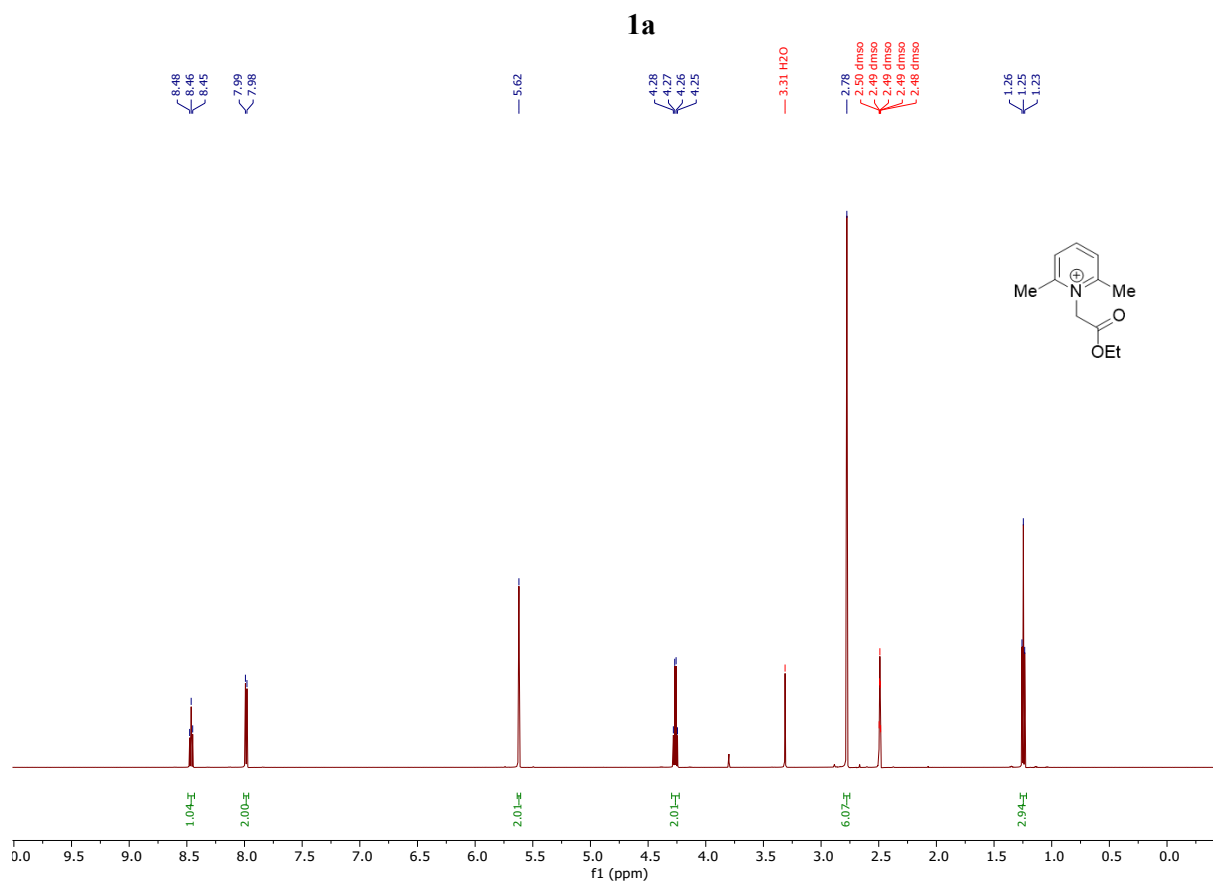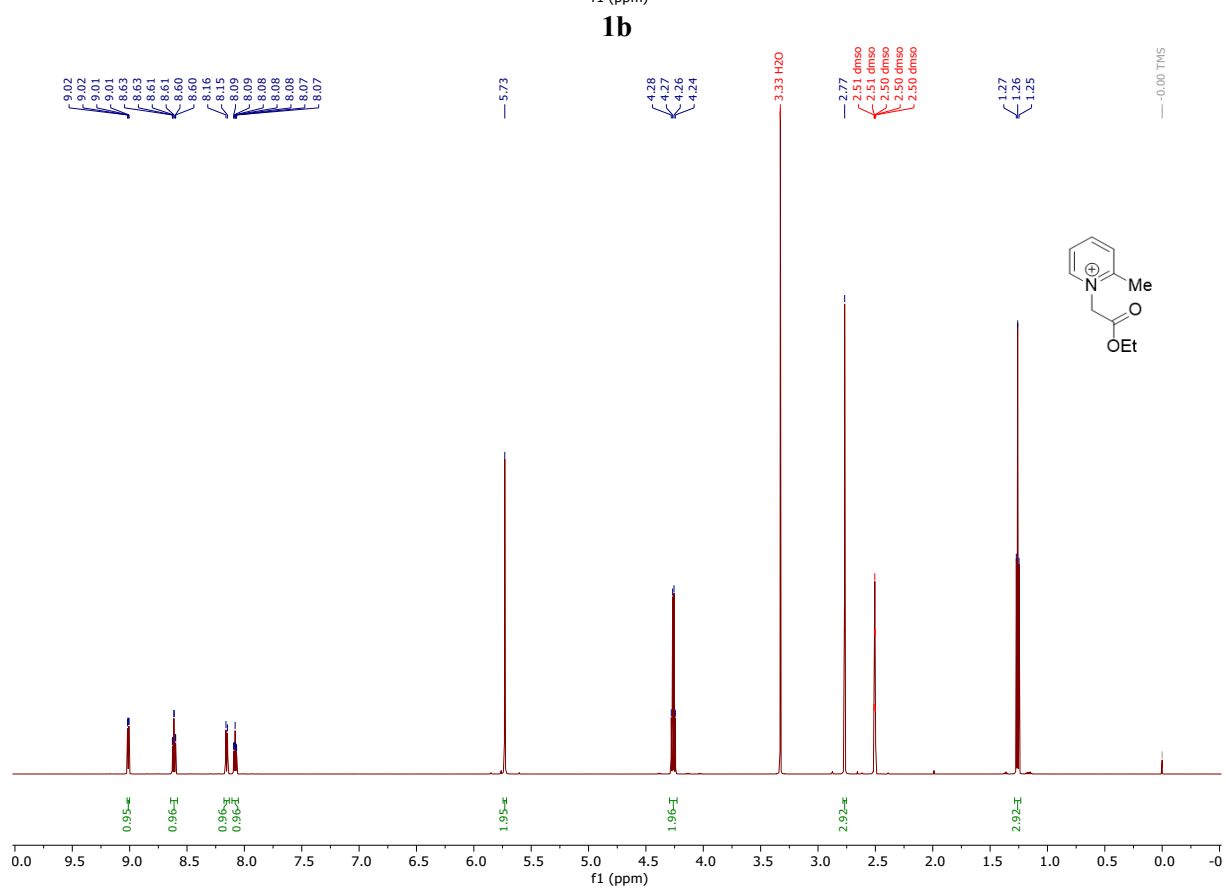

1c

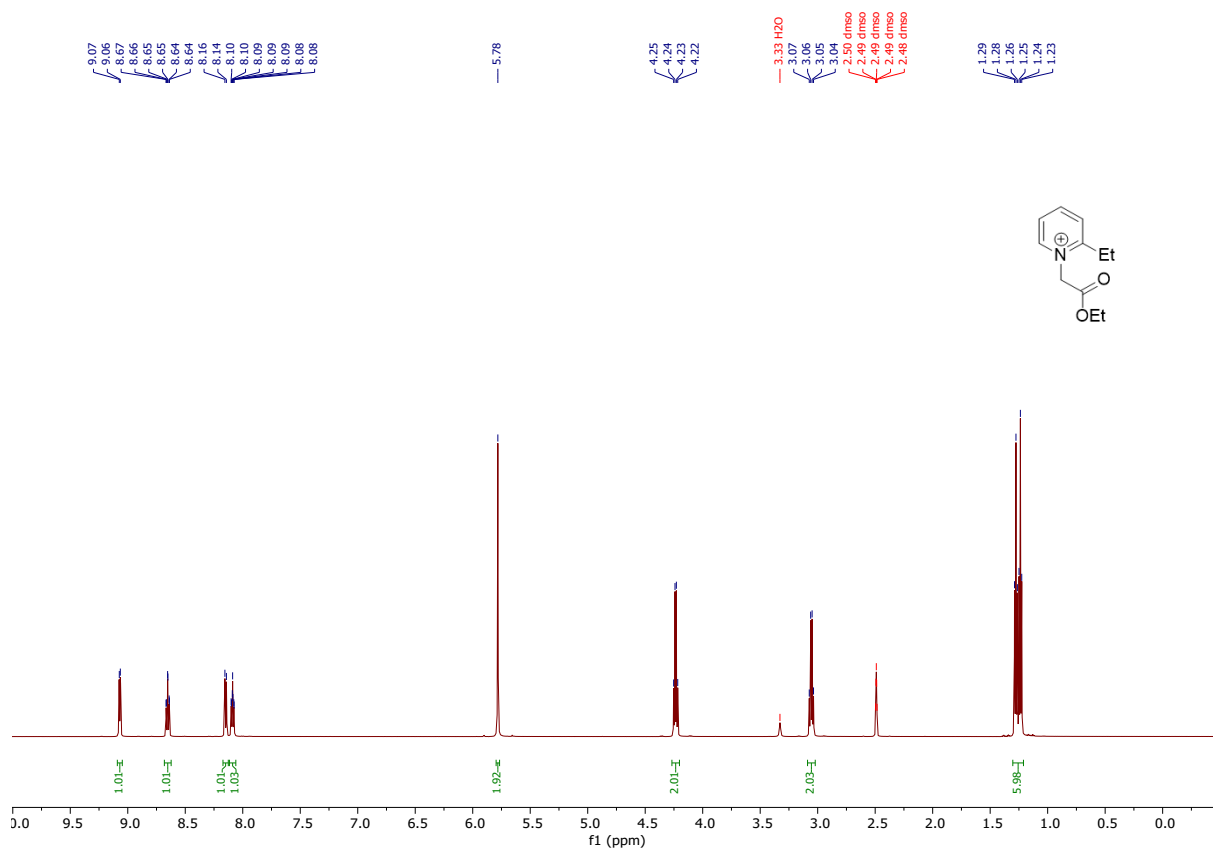

1d

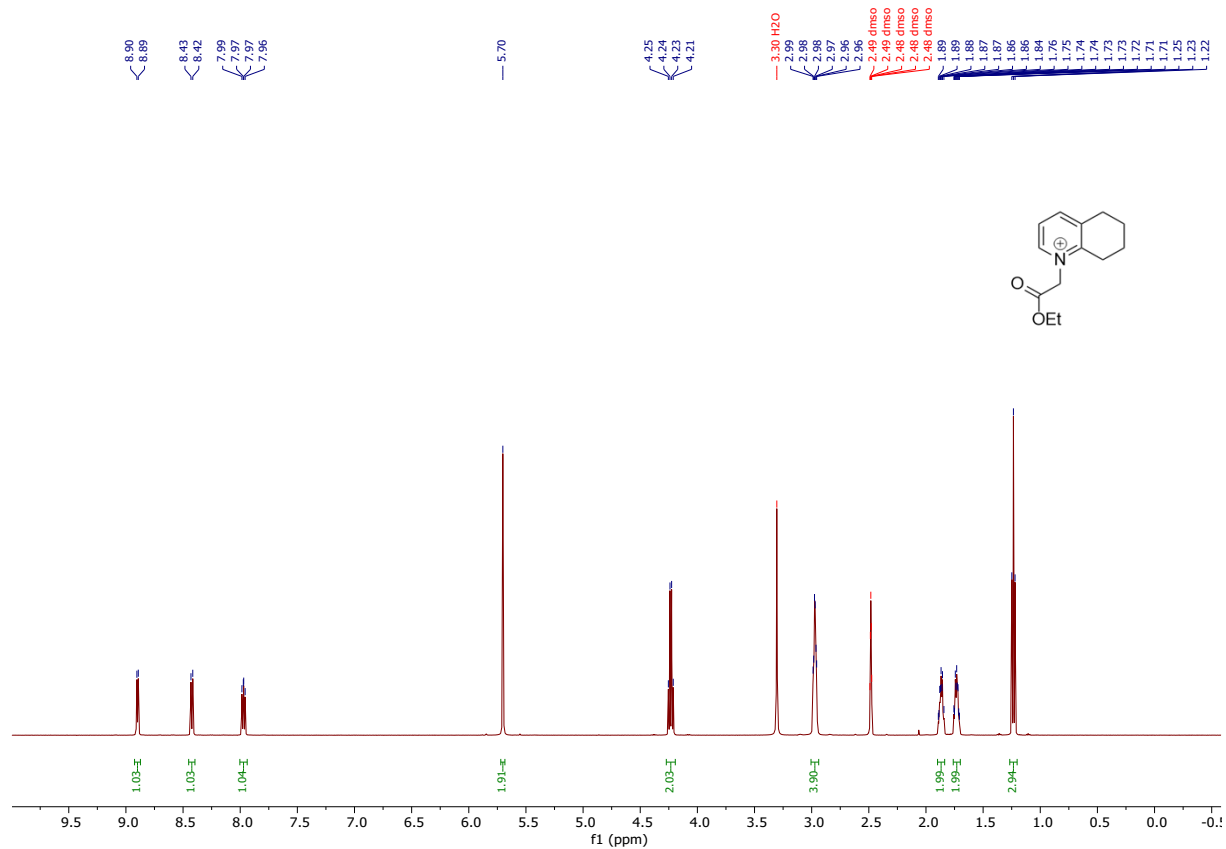



1e

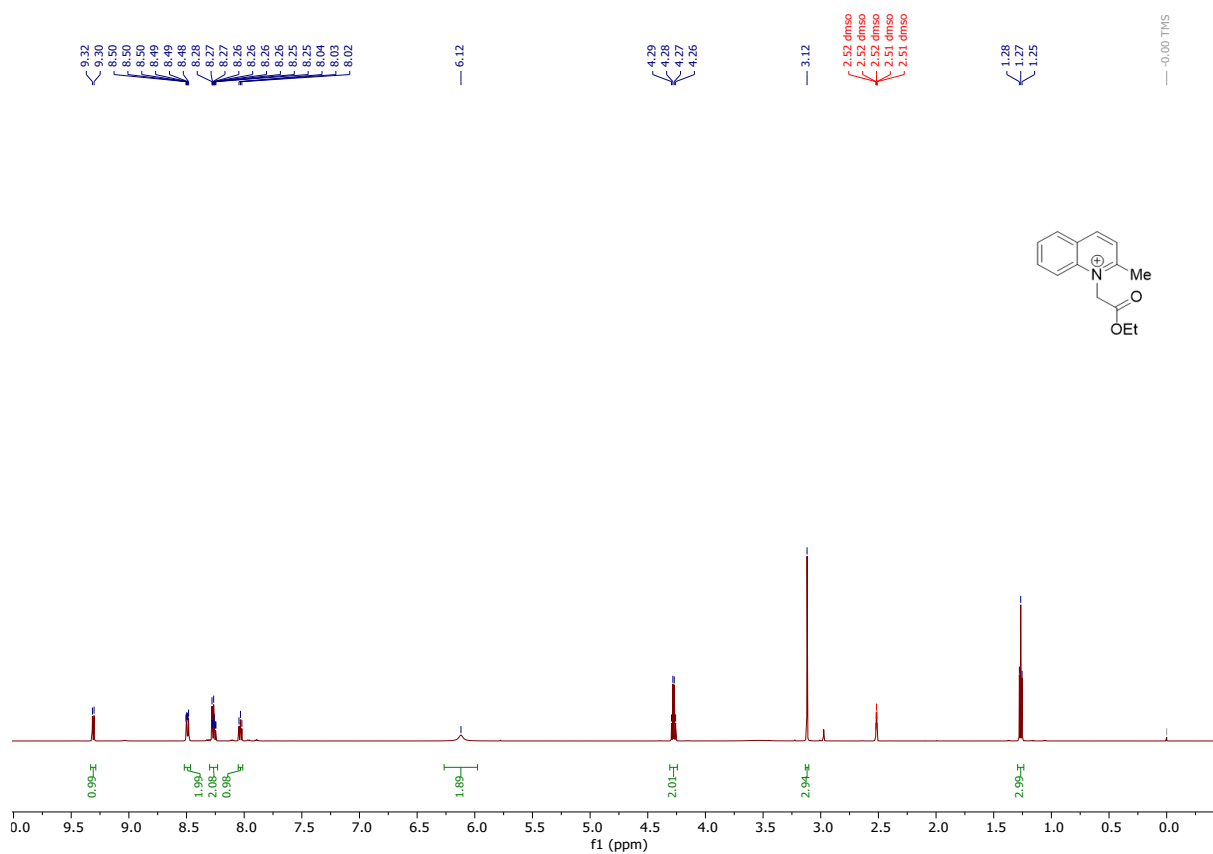

1f

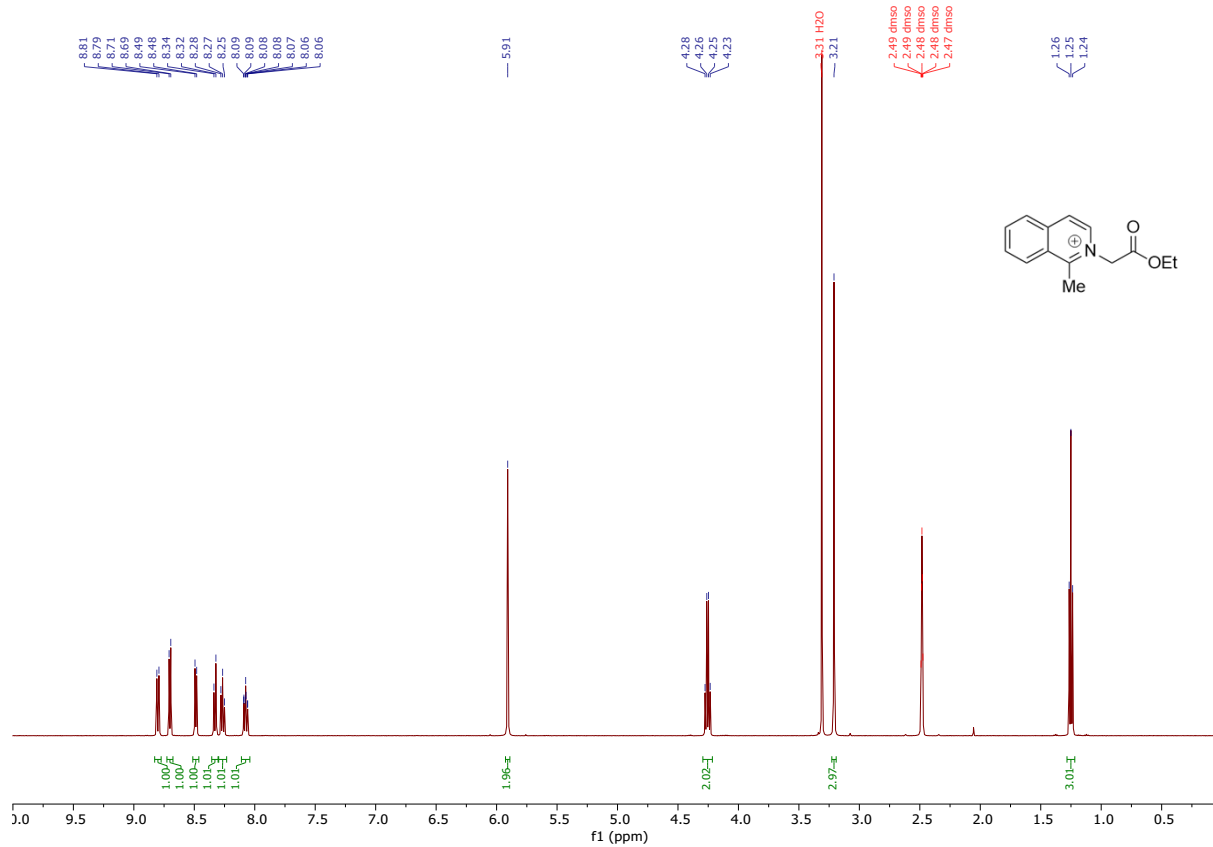

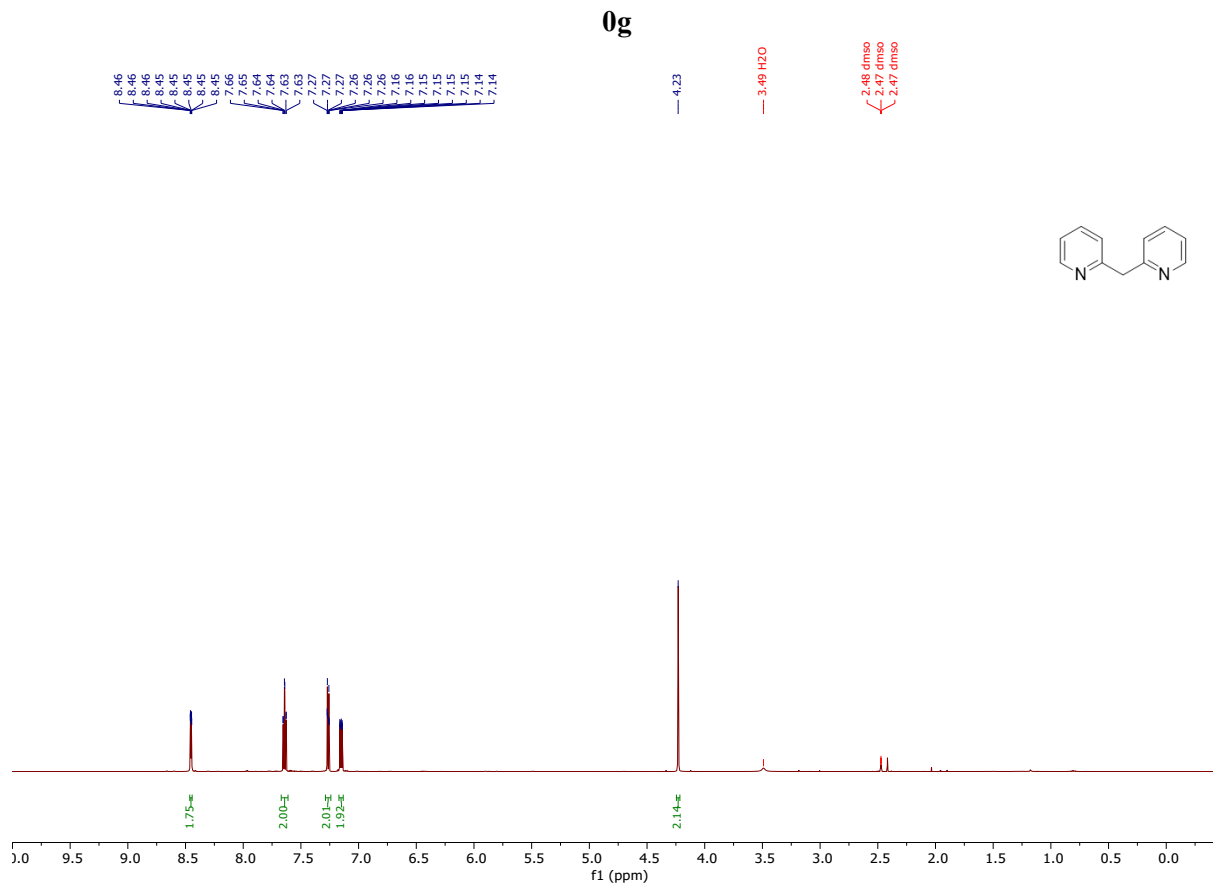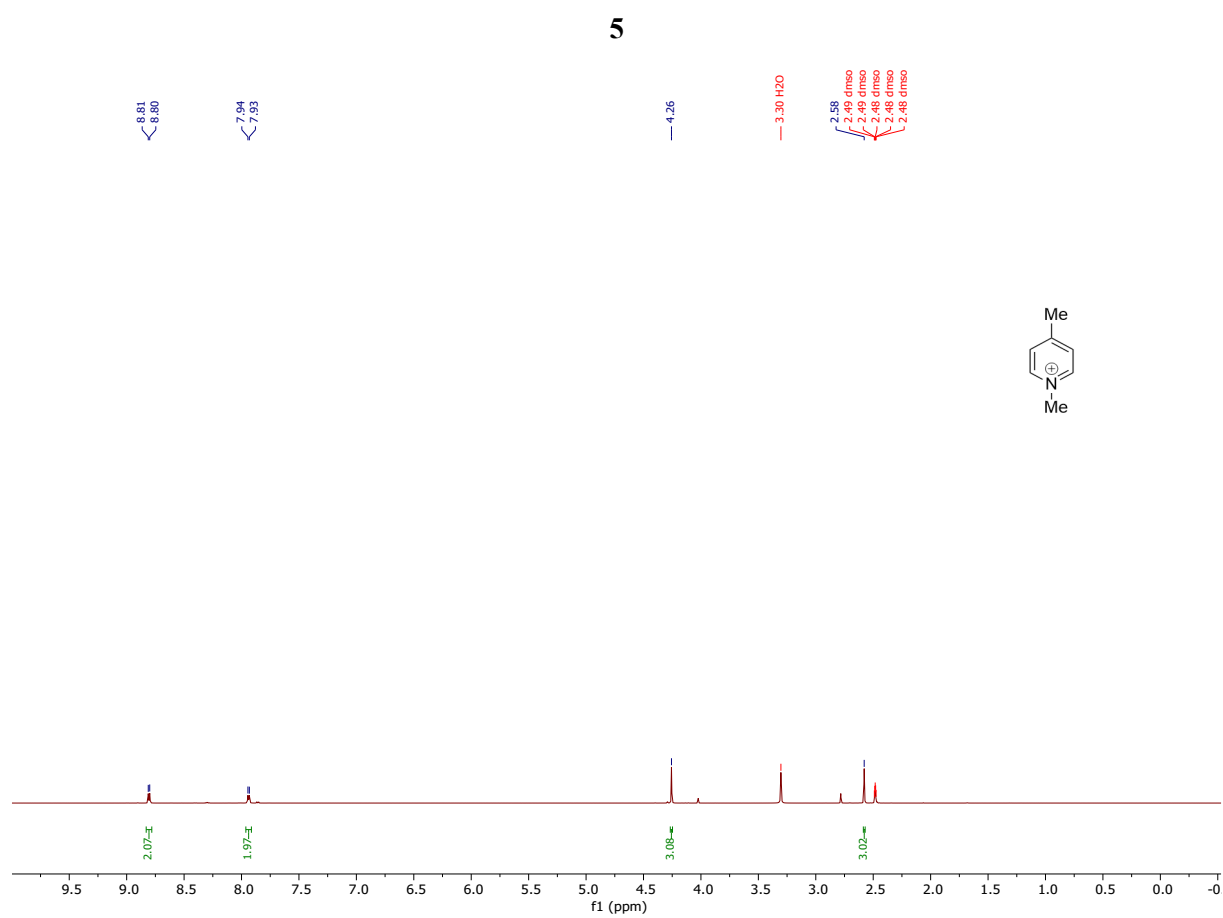

2a

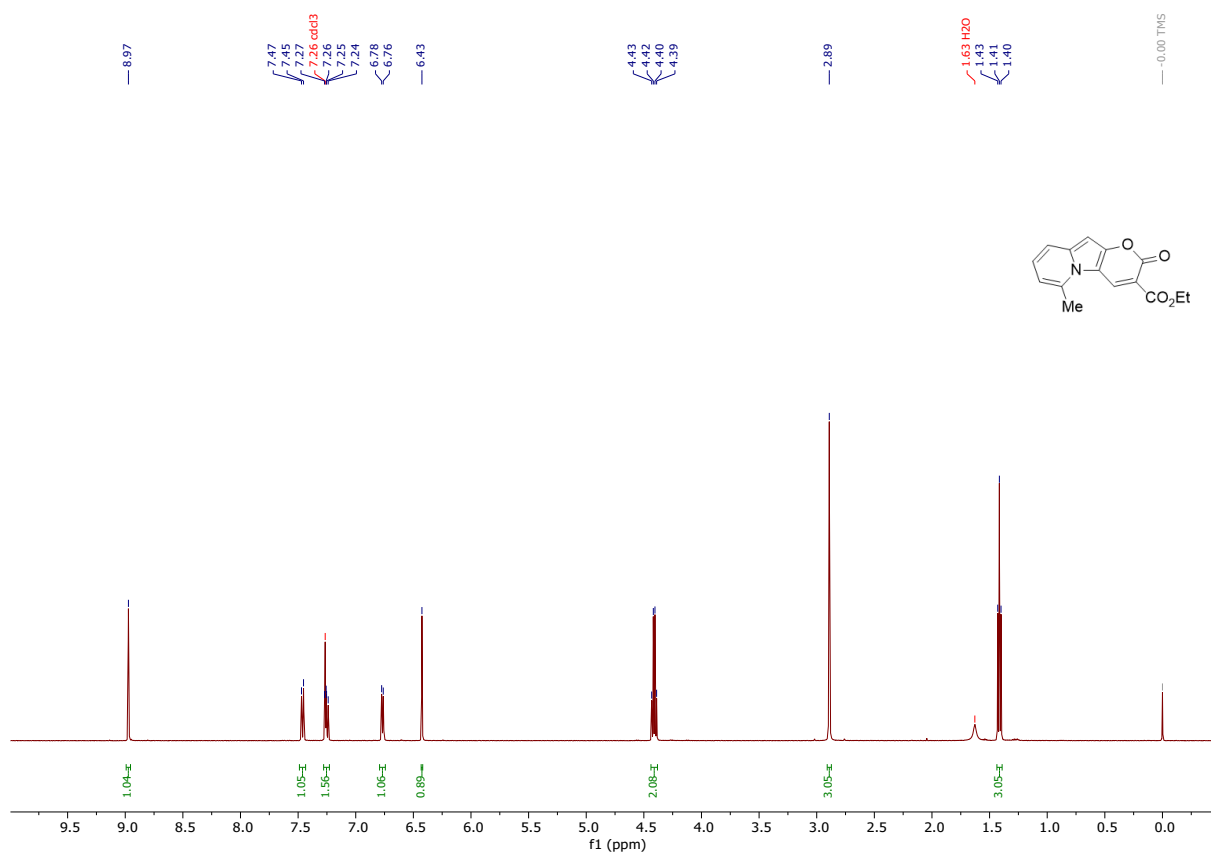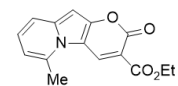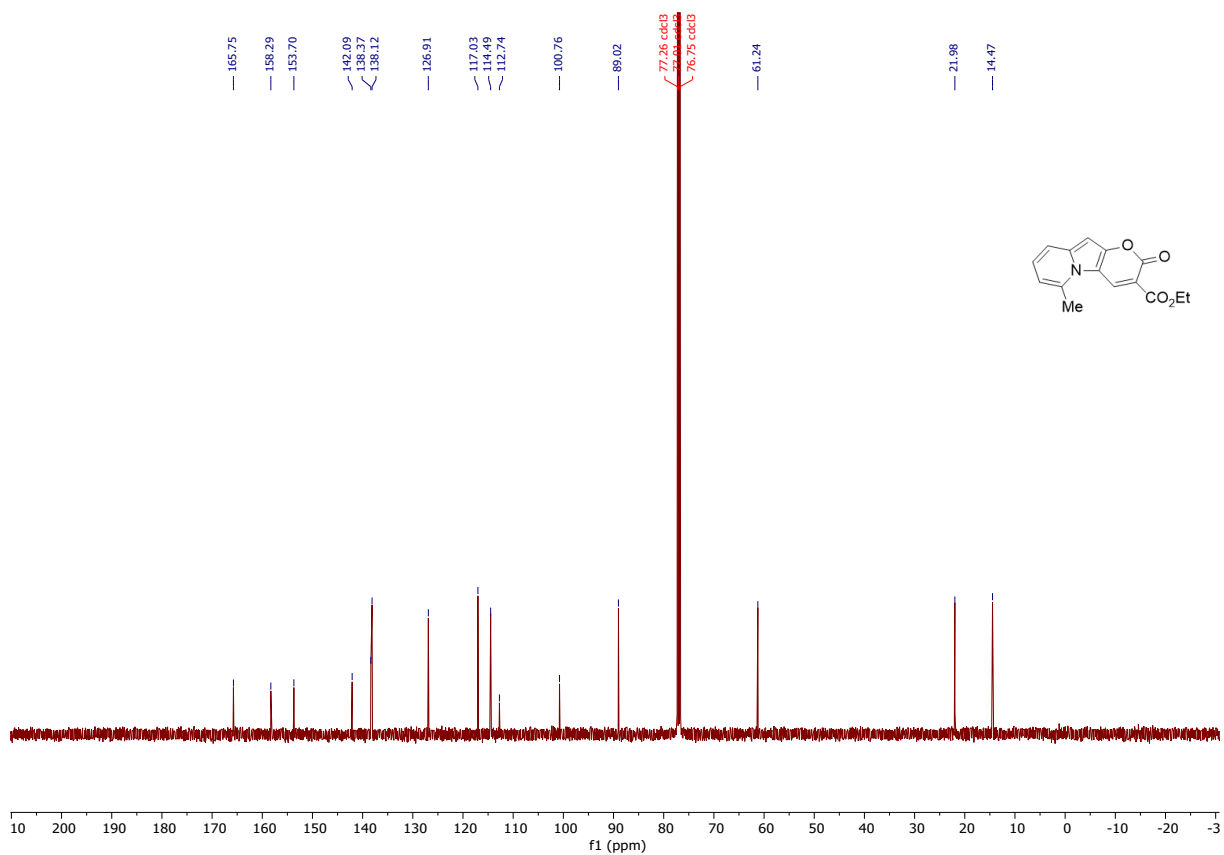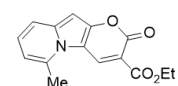

## 2b

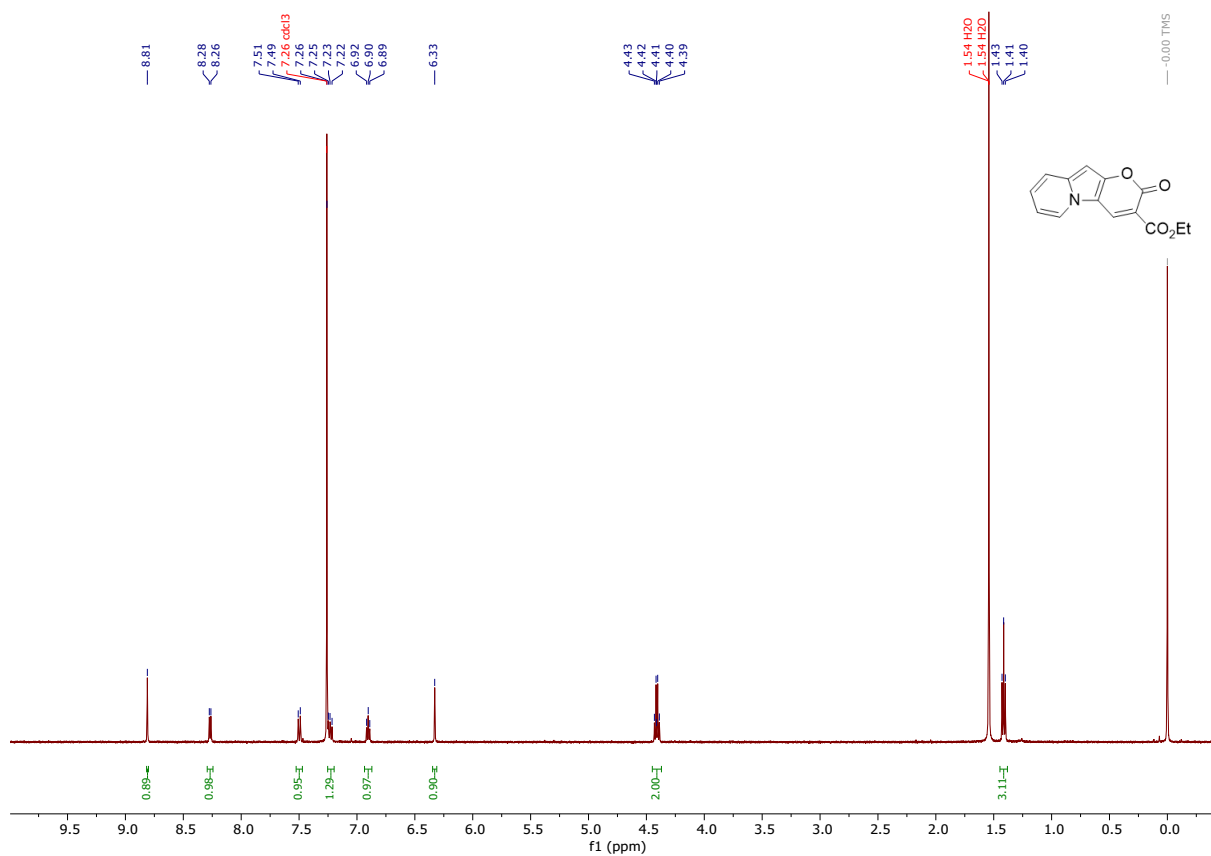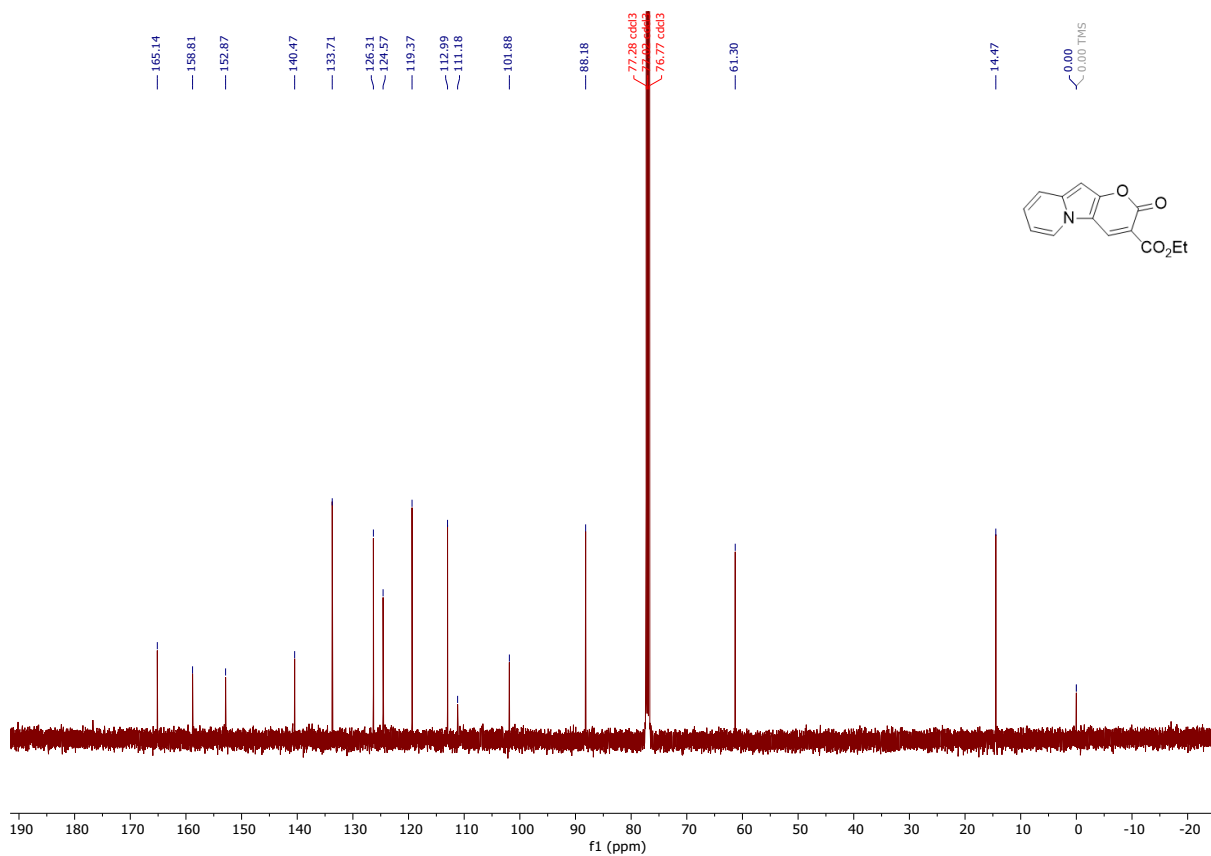

## 2c

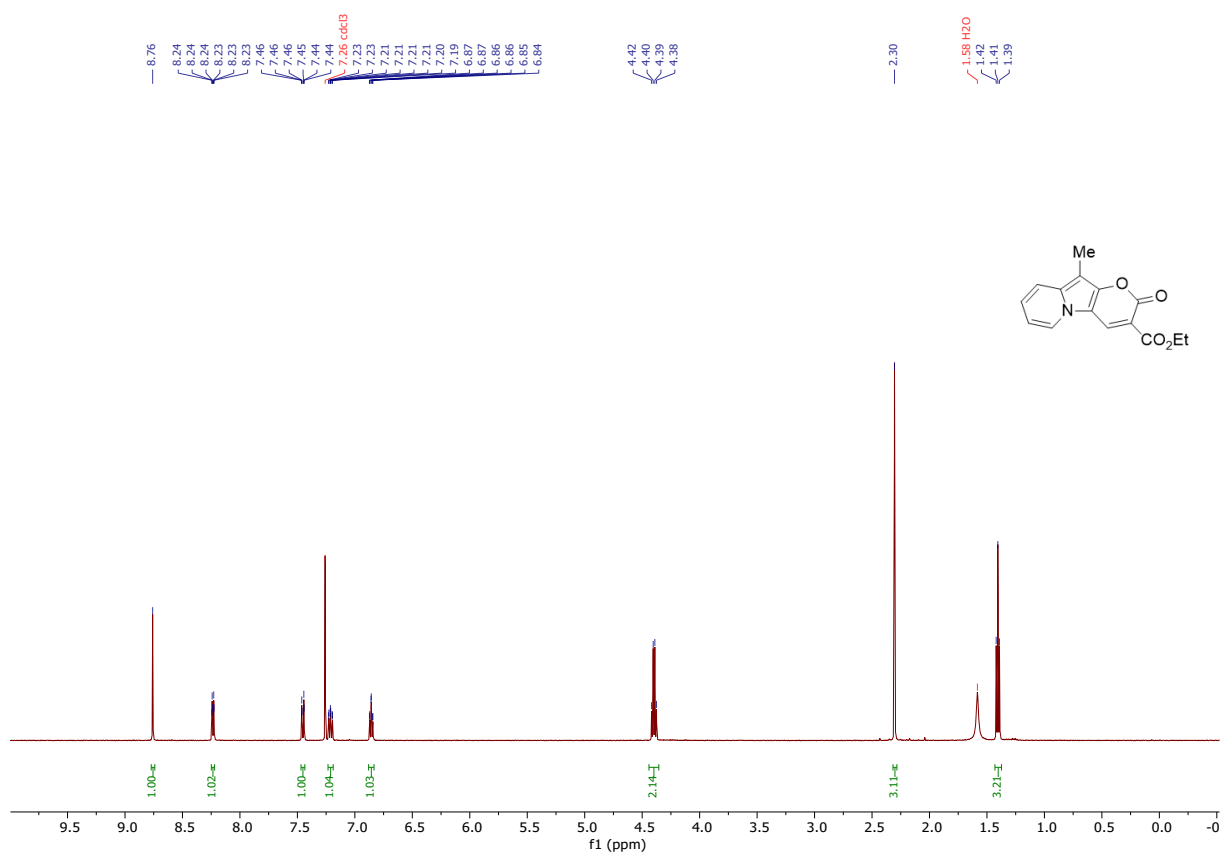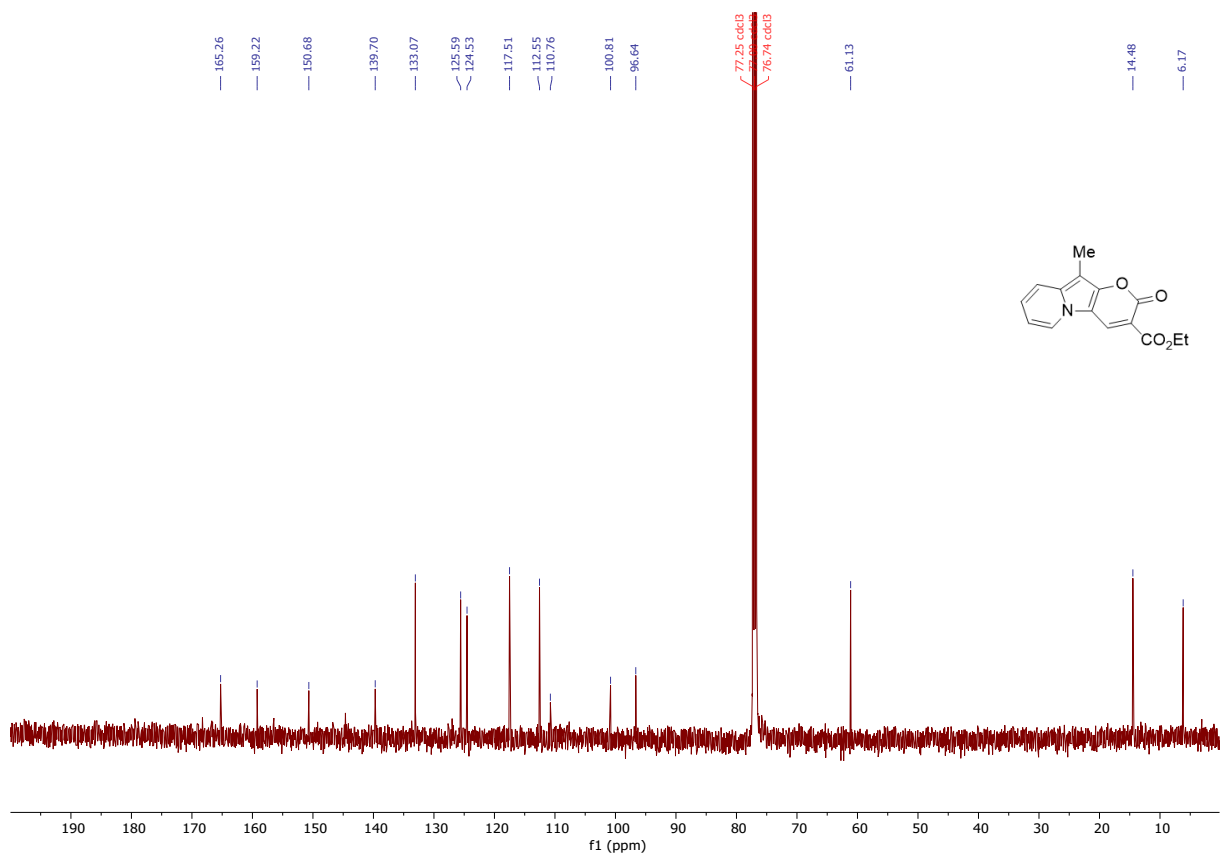

2d

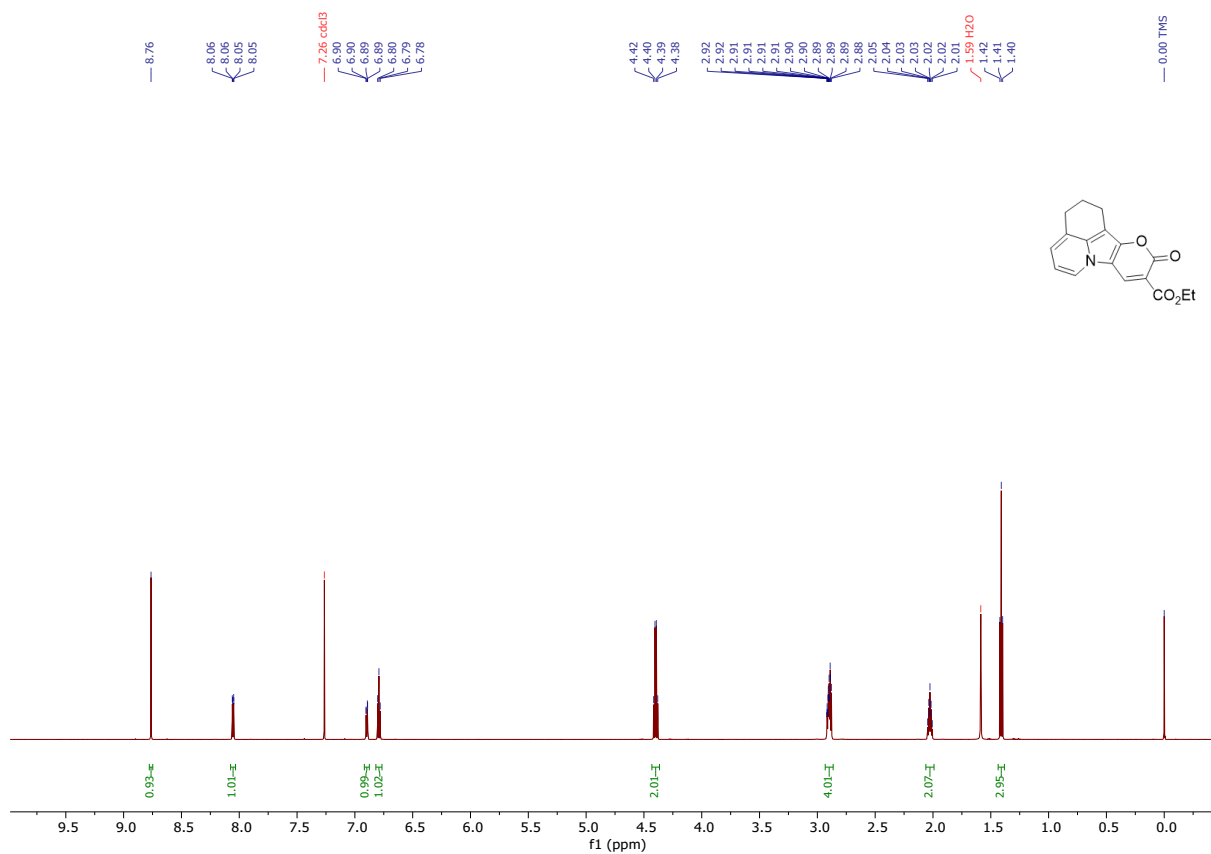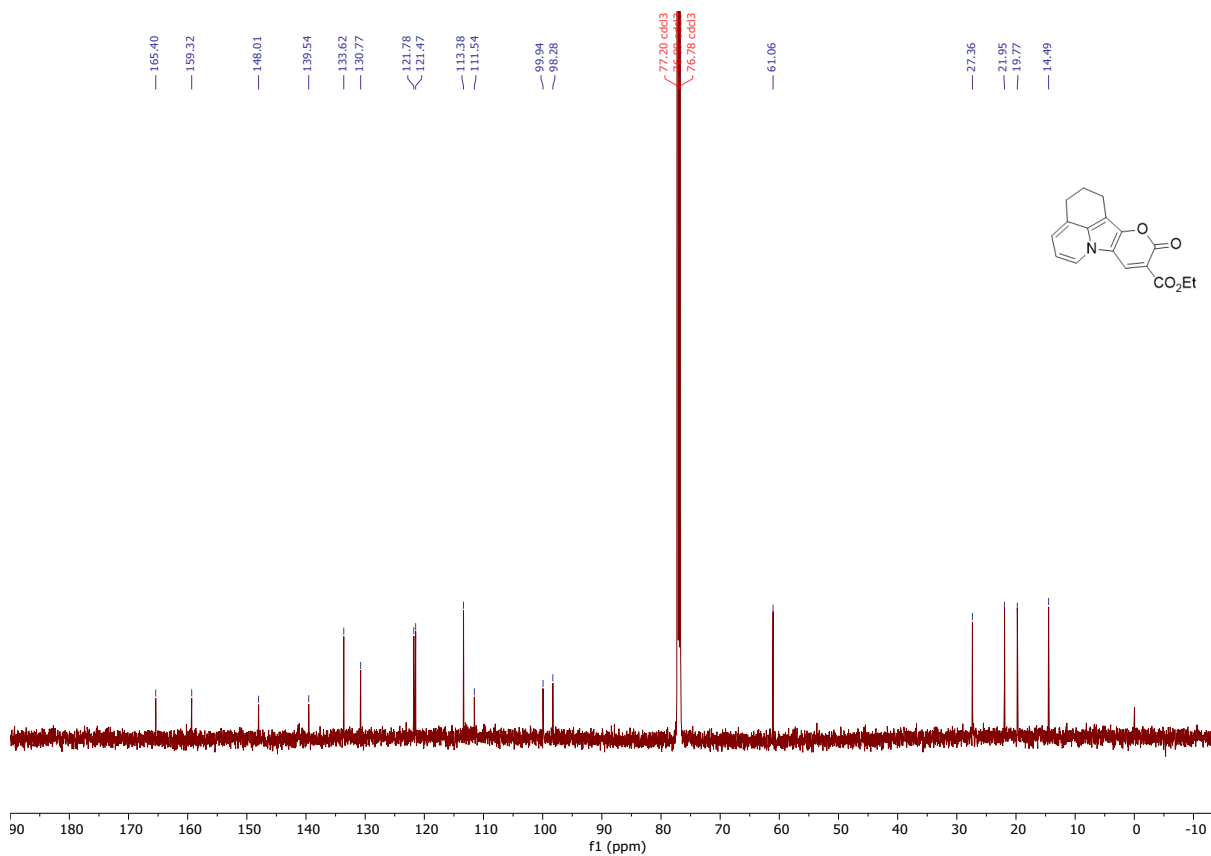

2e

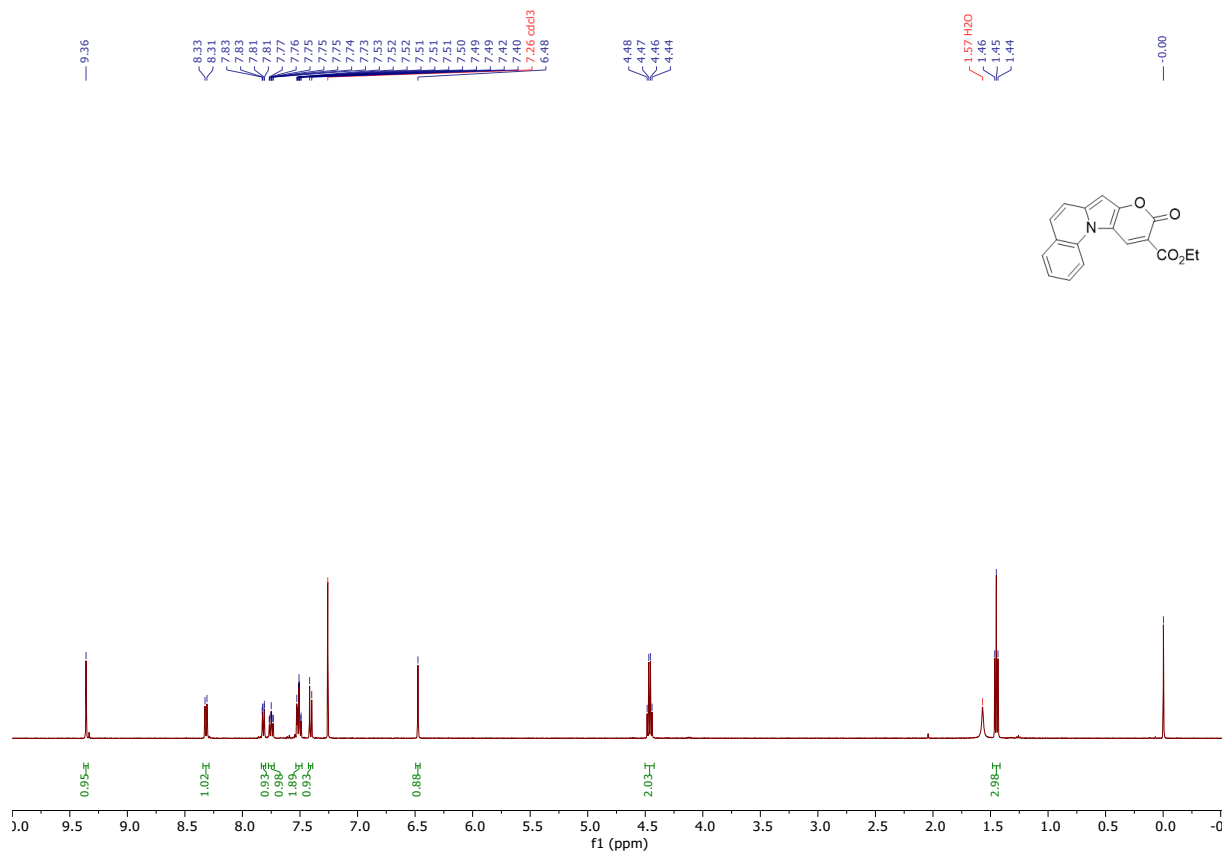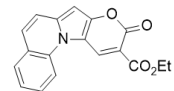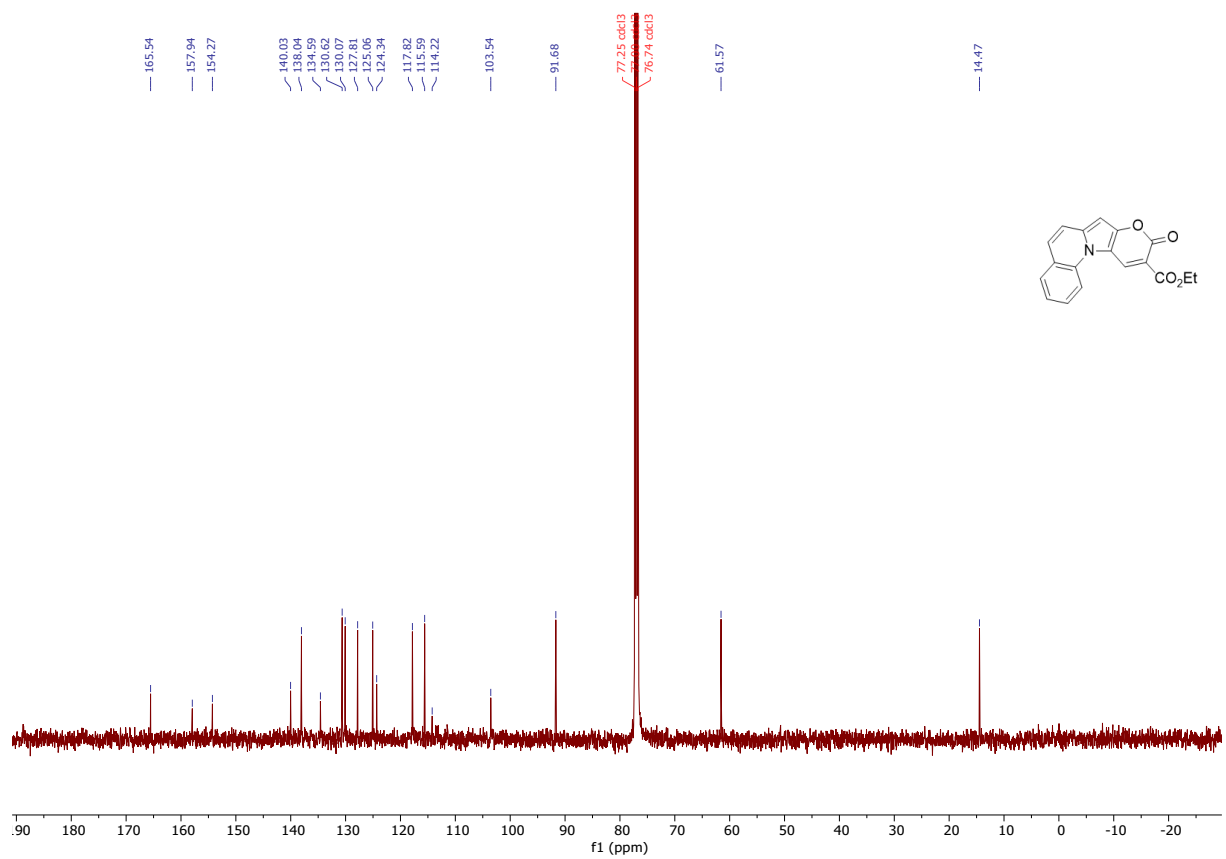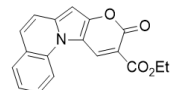

2f

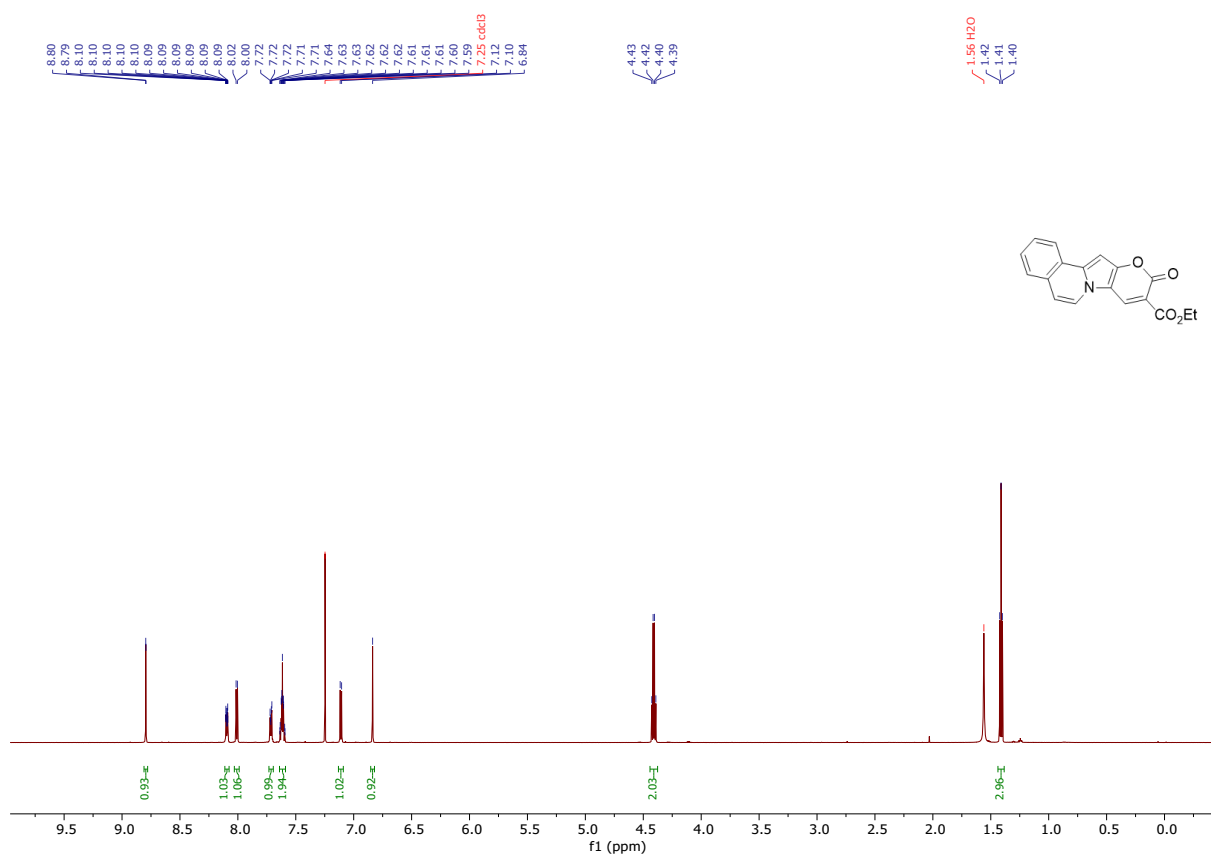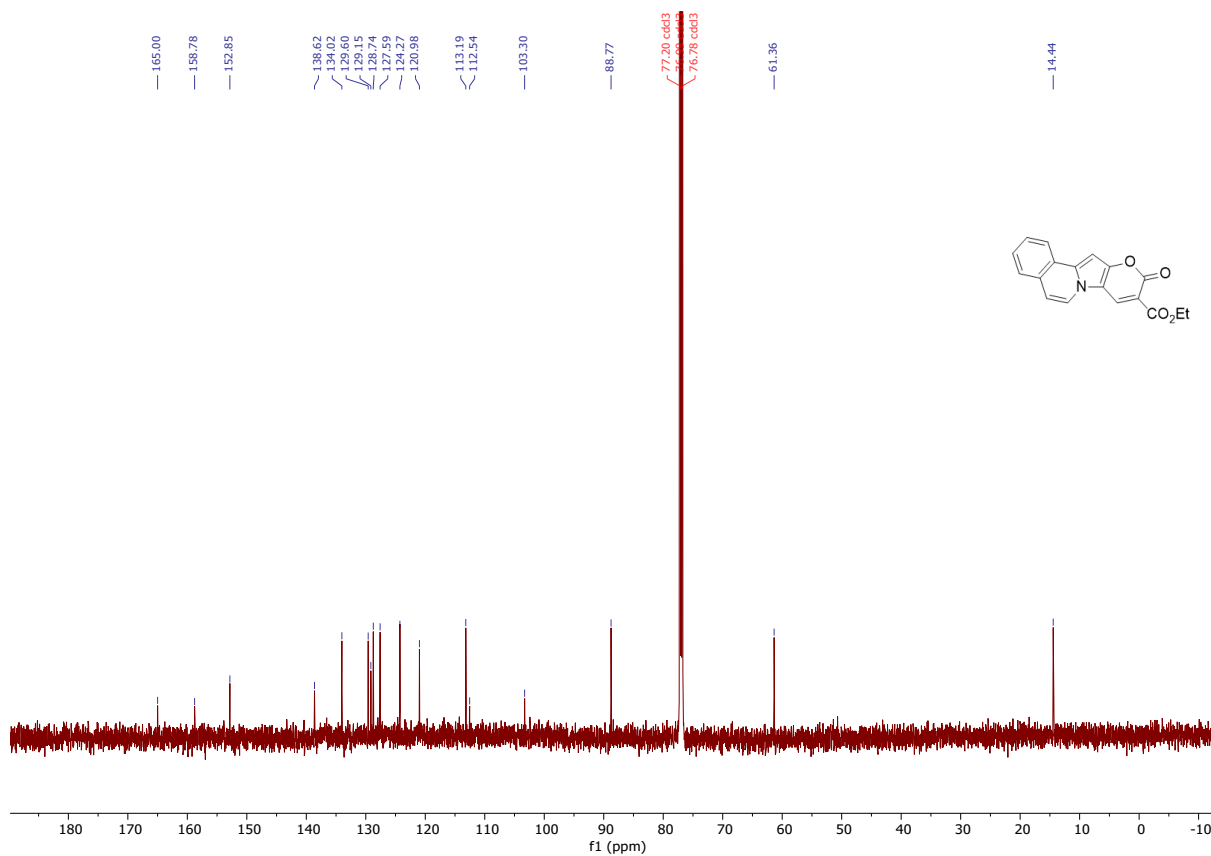



2g

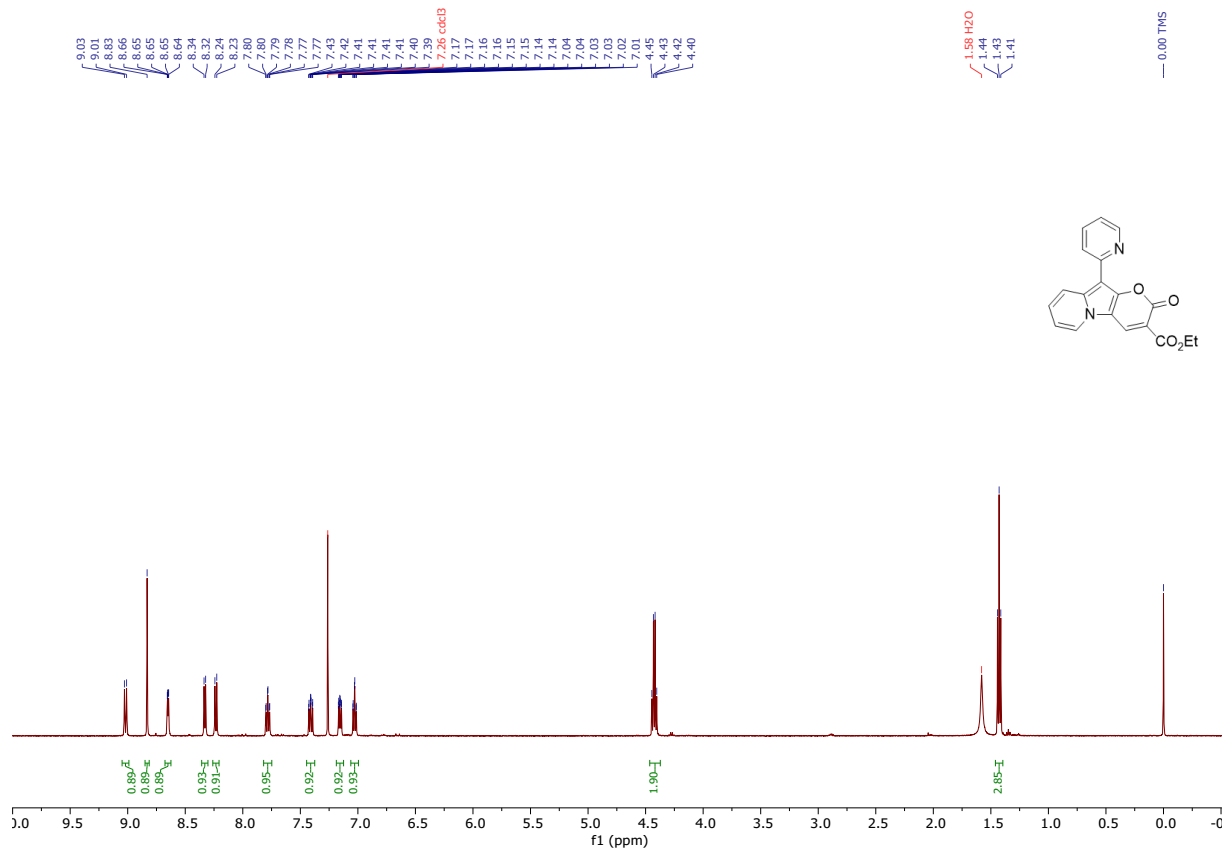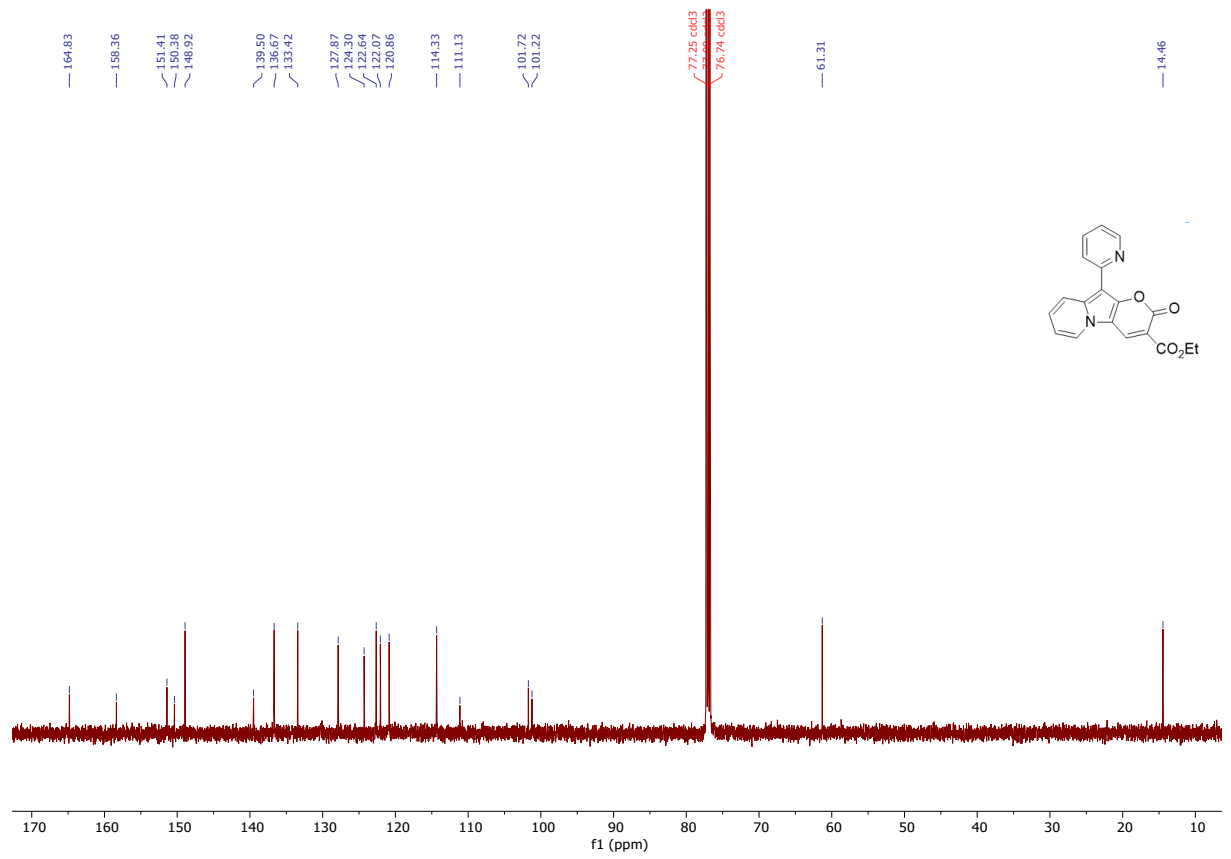

2h

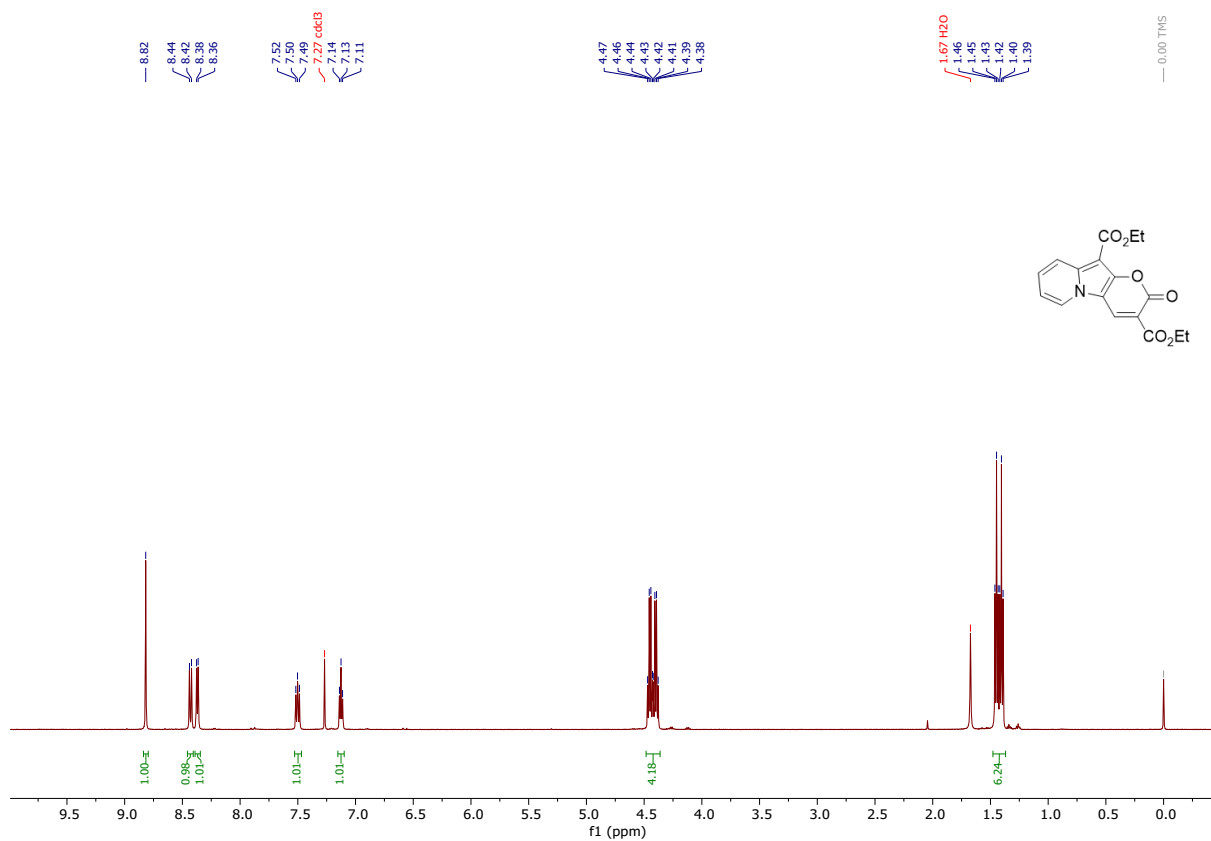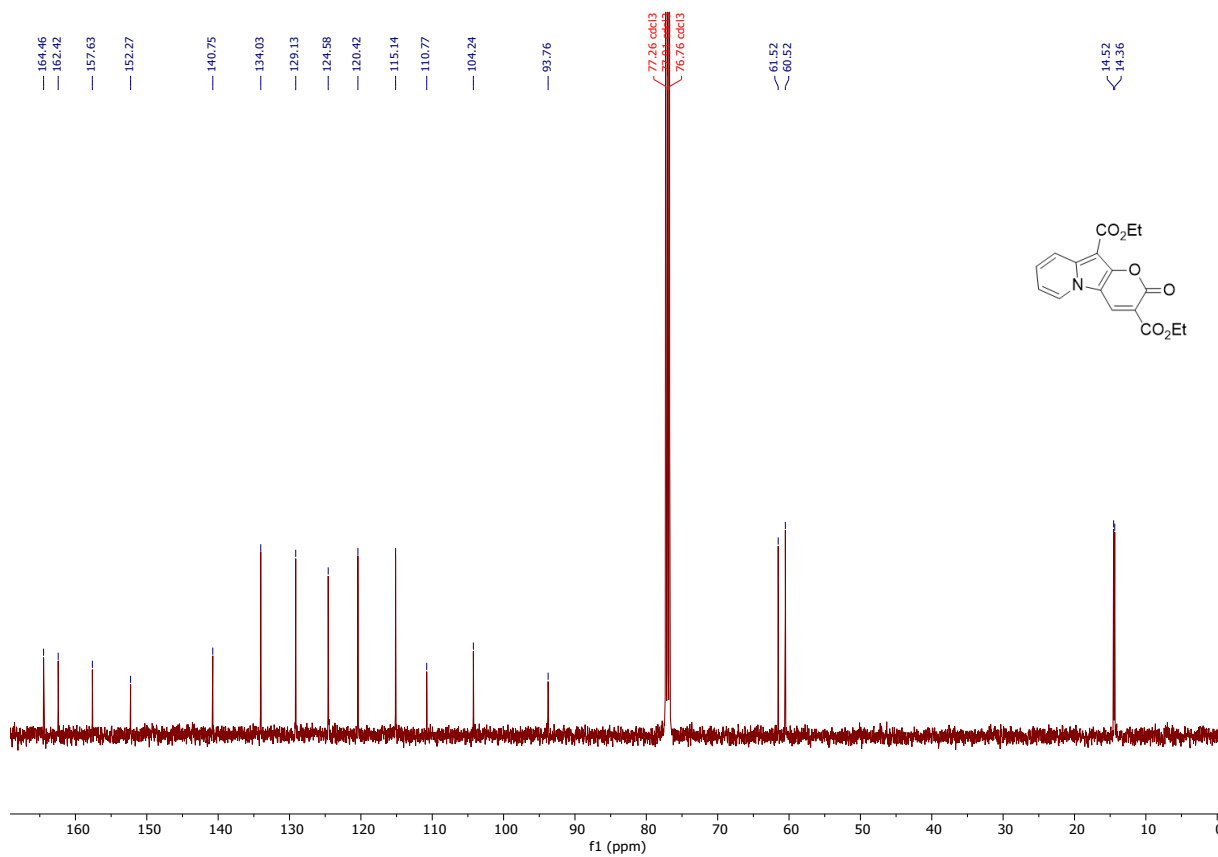

2i

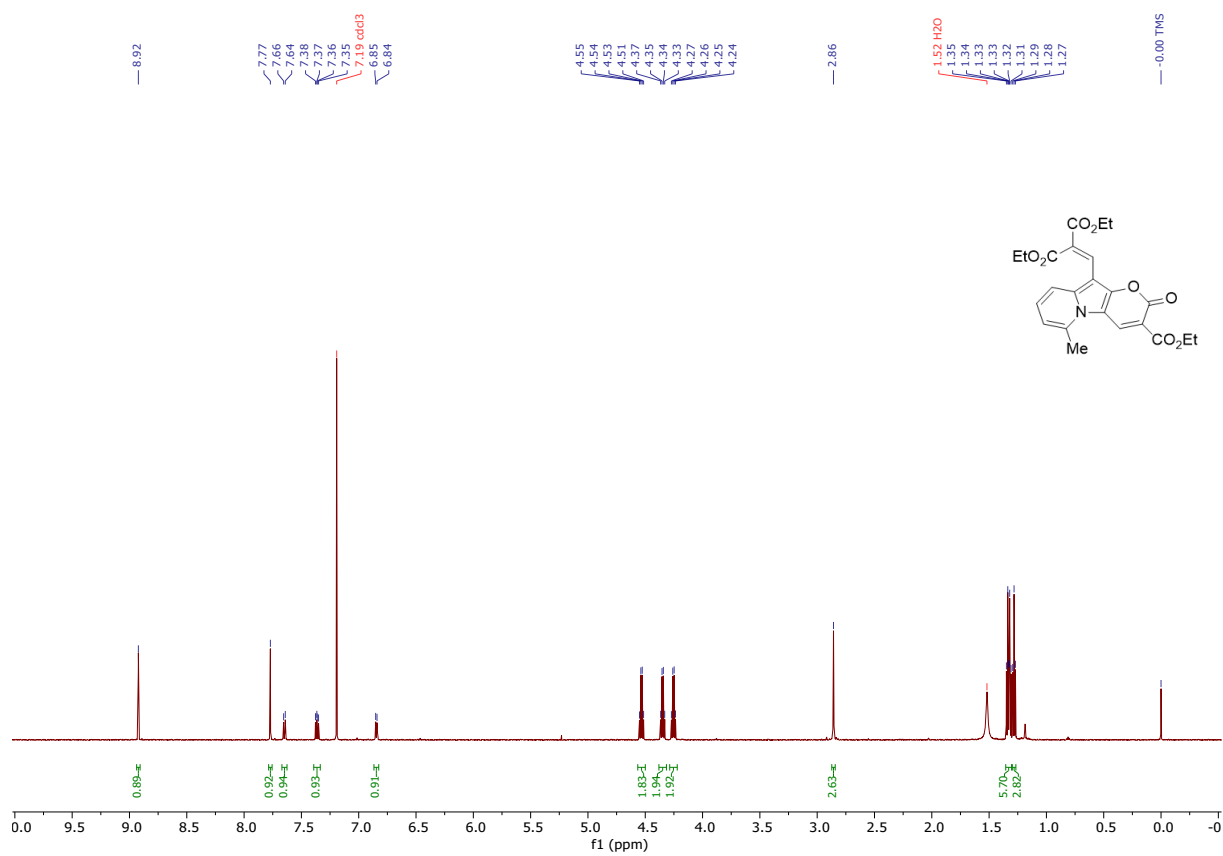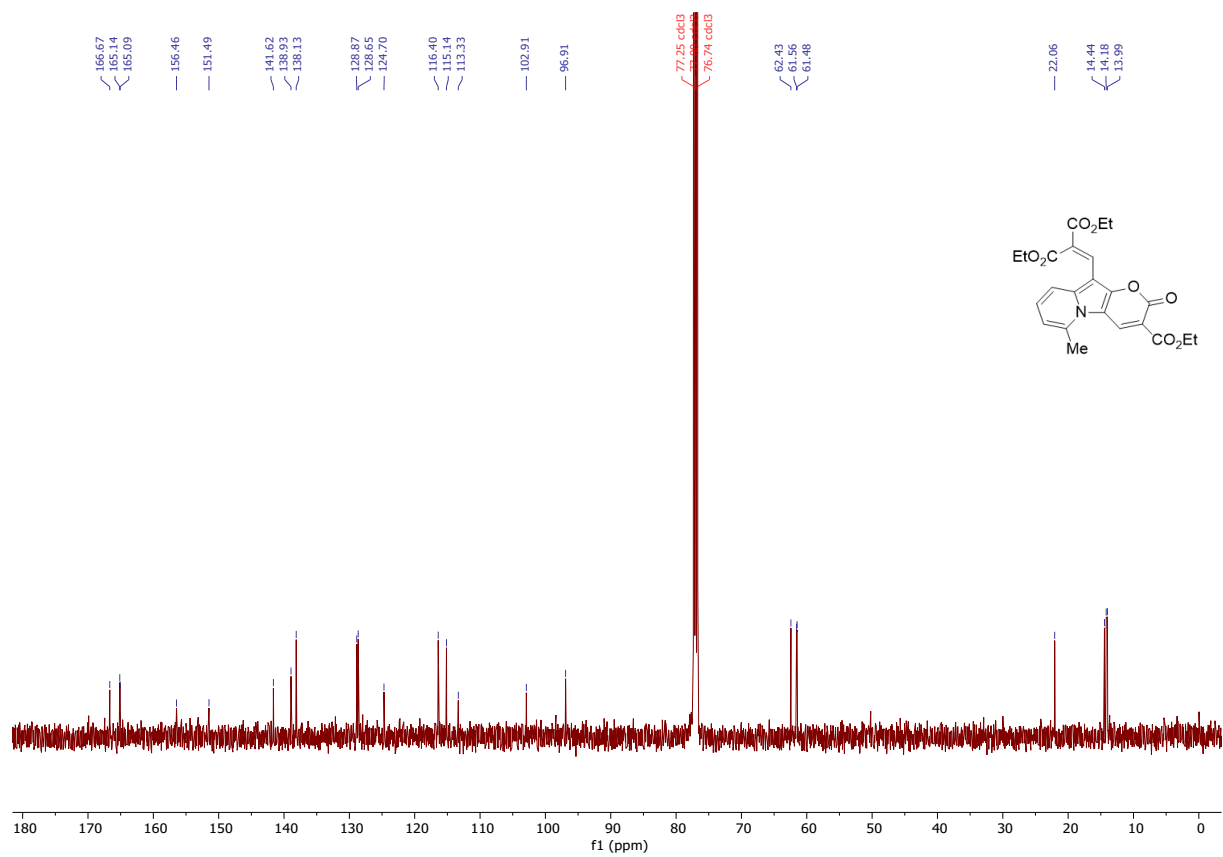

### 3aa

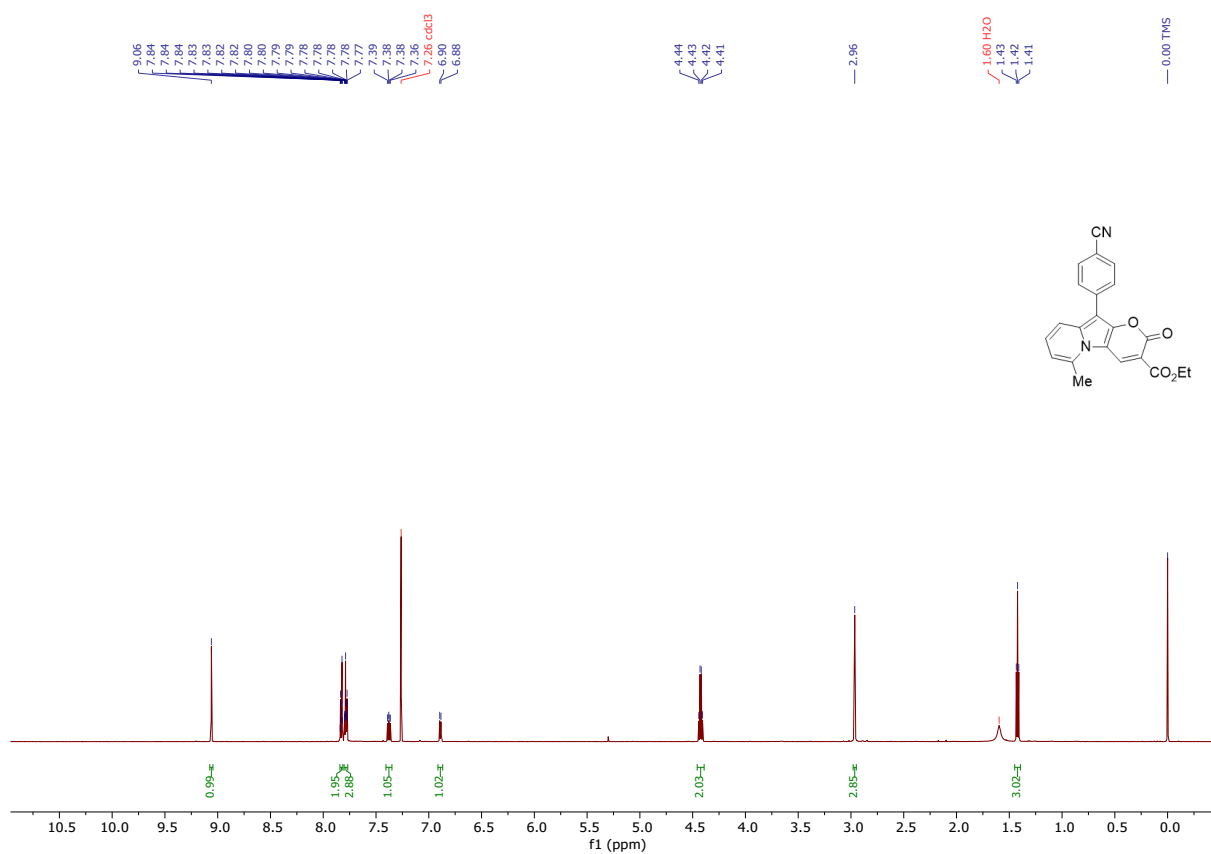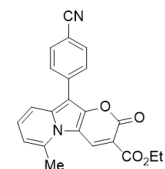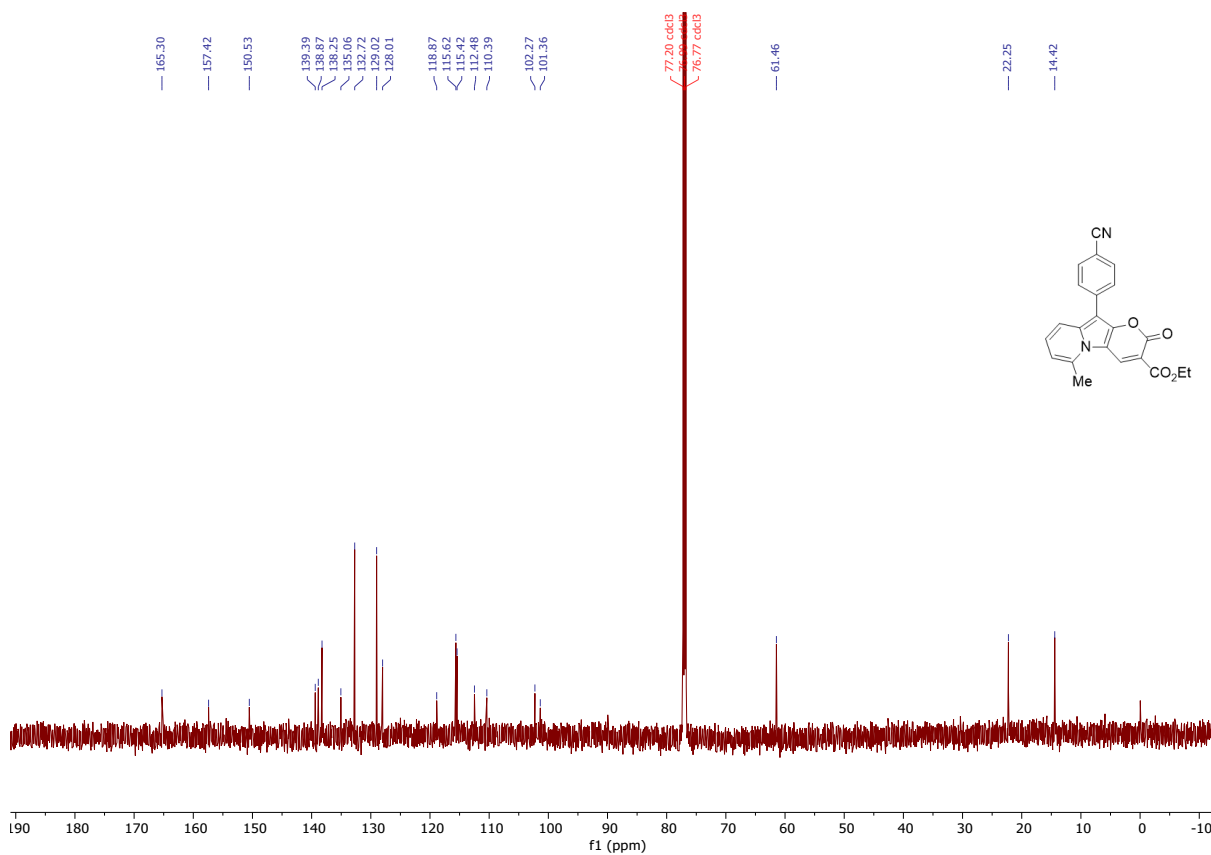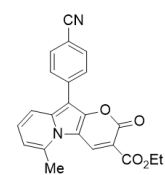

### 3ab

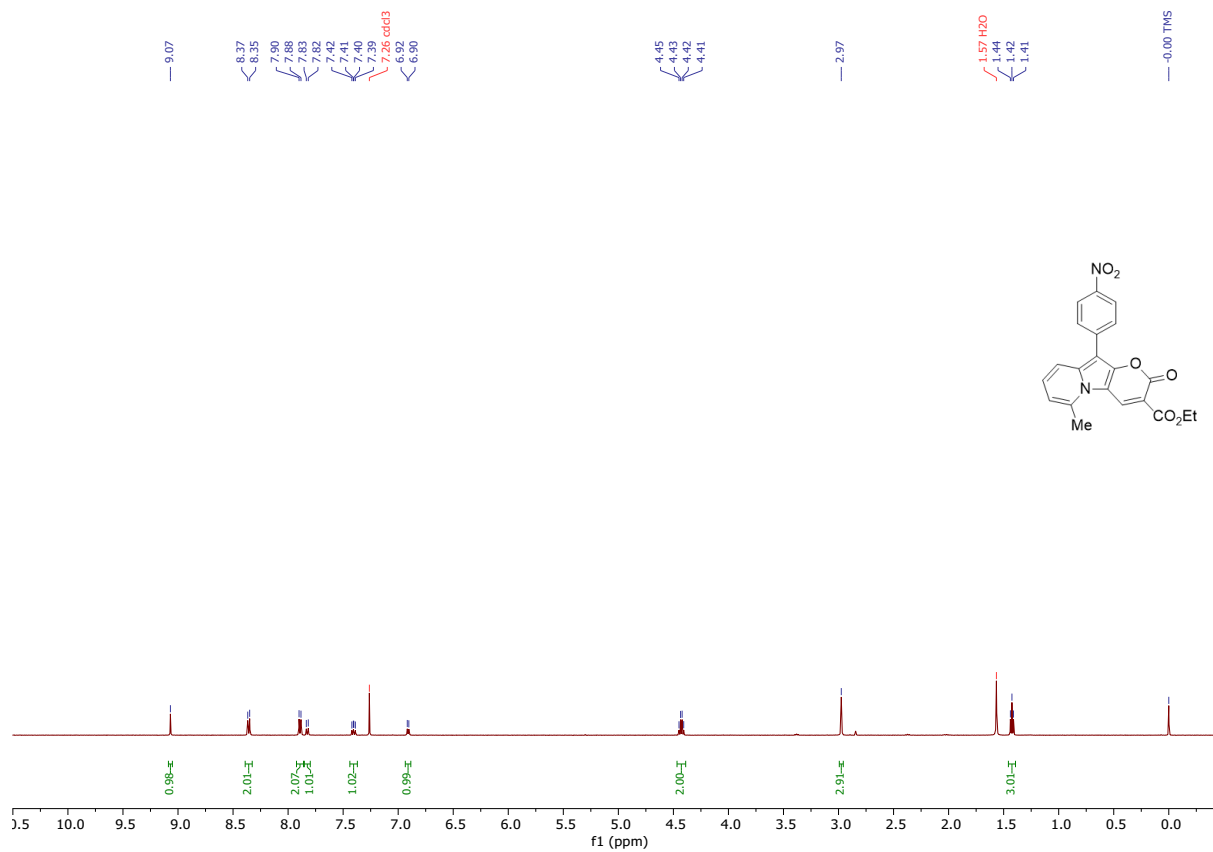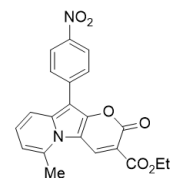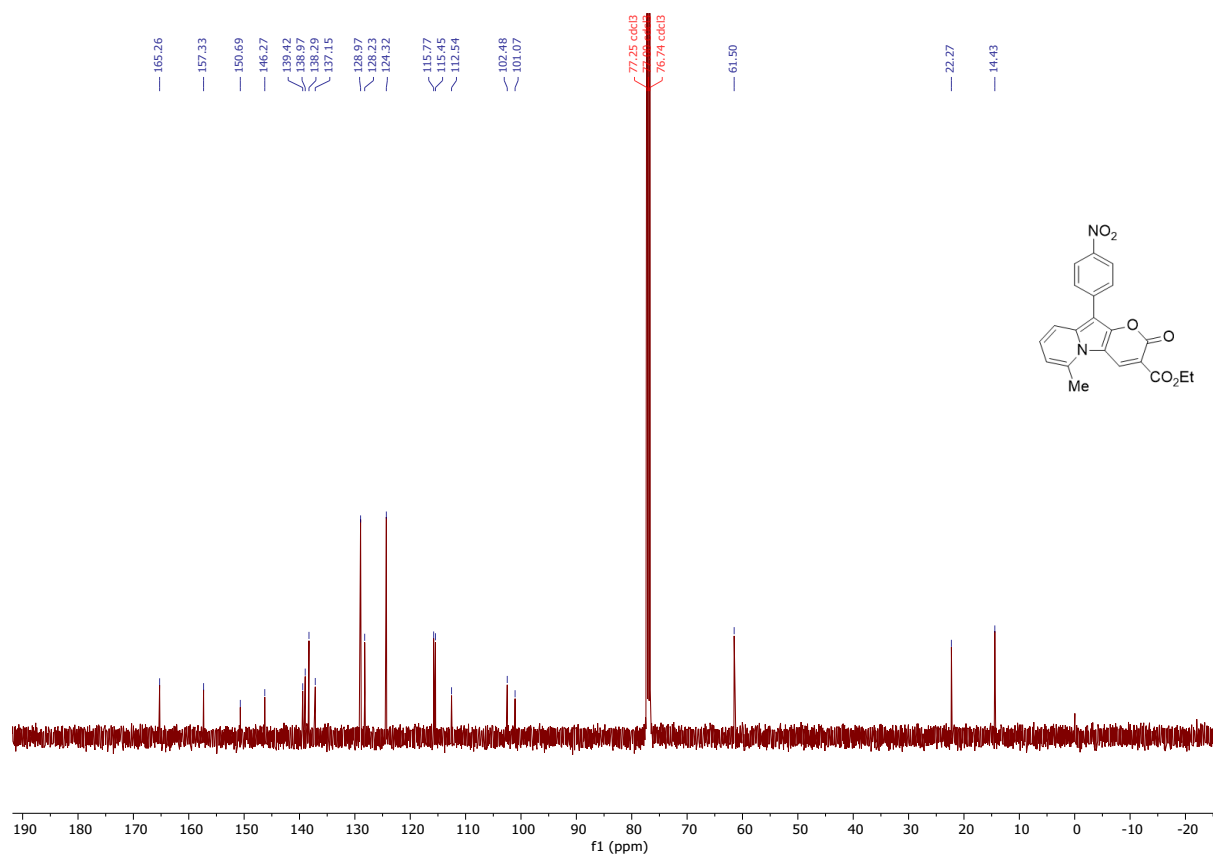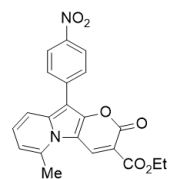

3ac

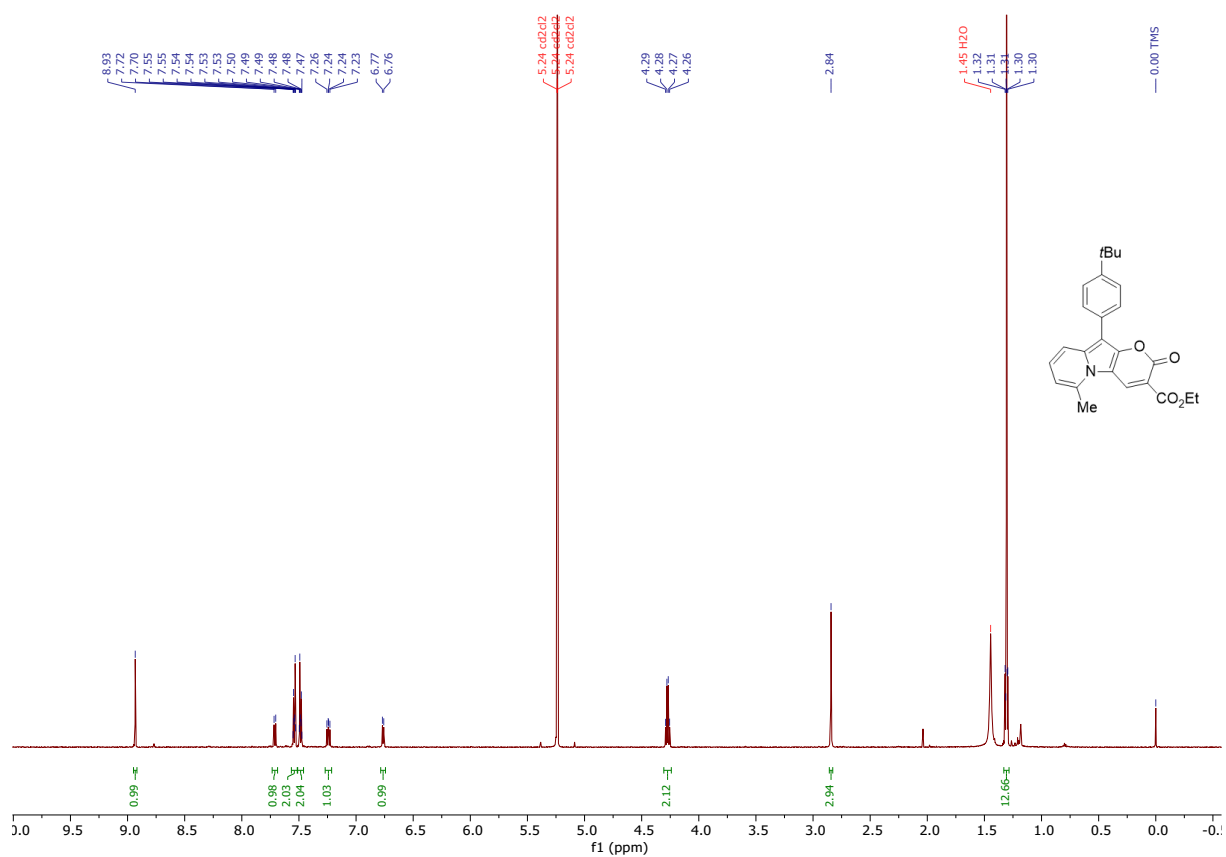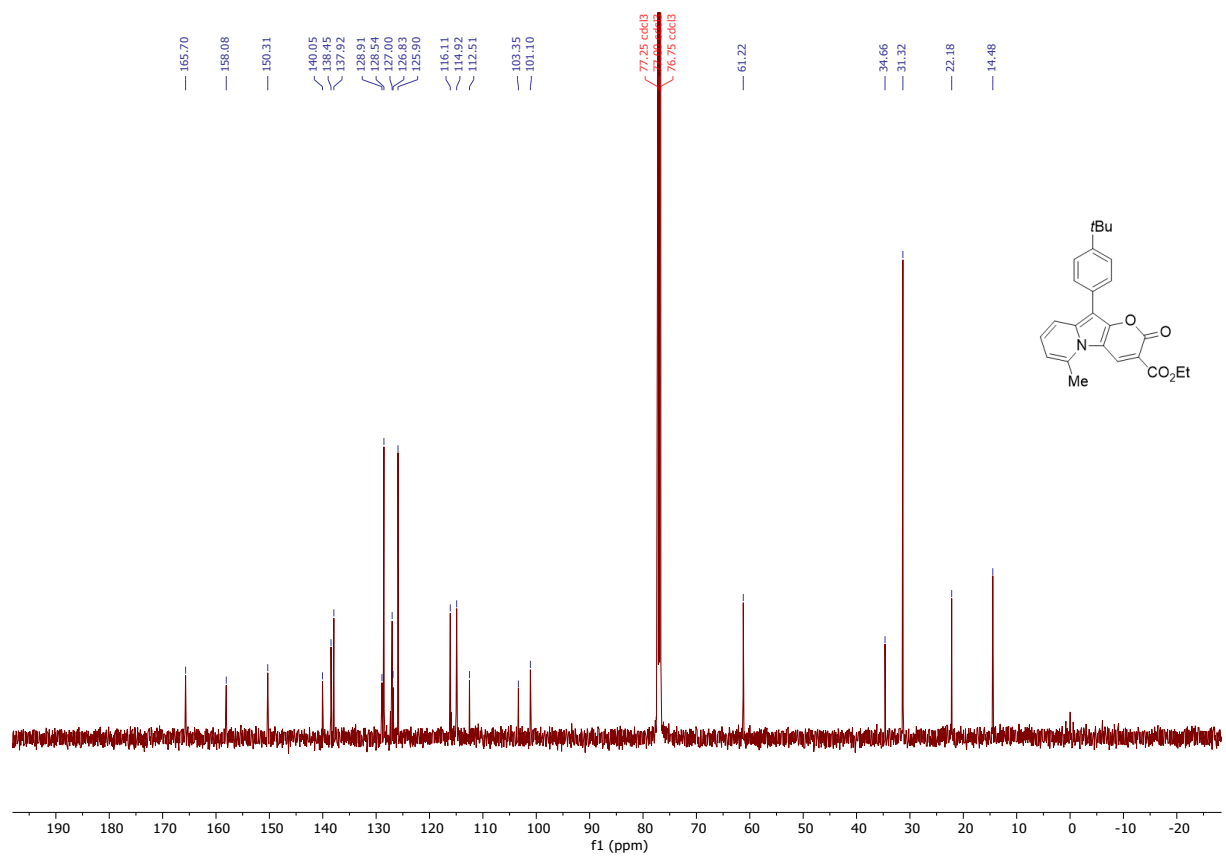

4a

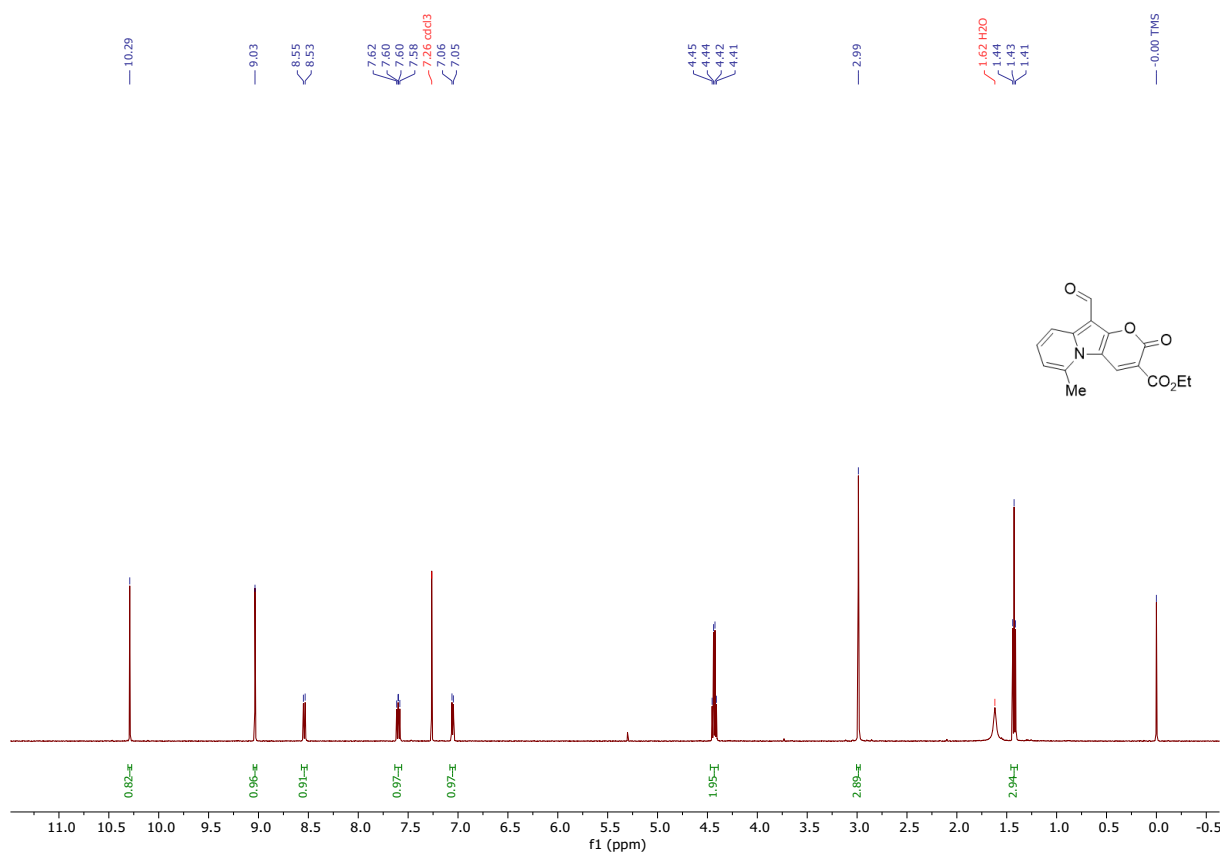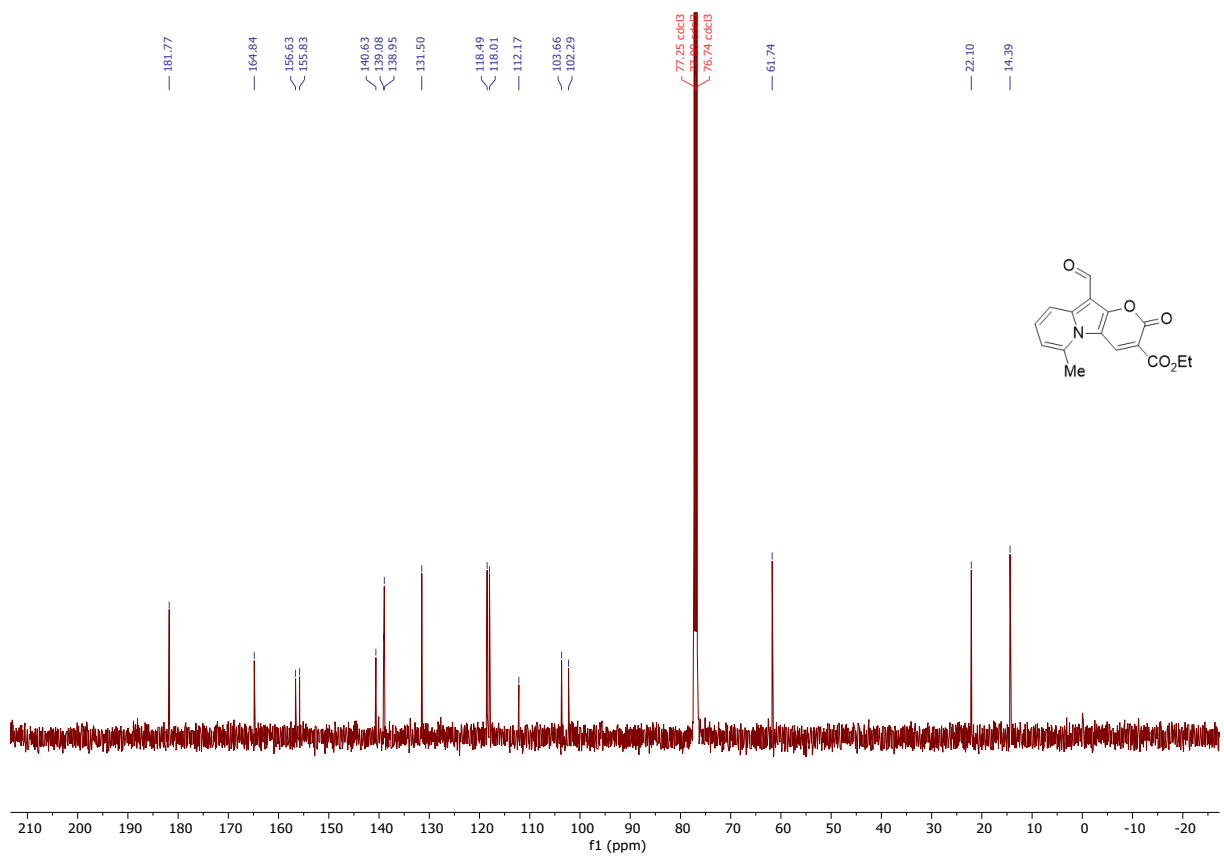

6a

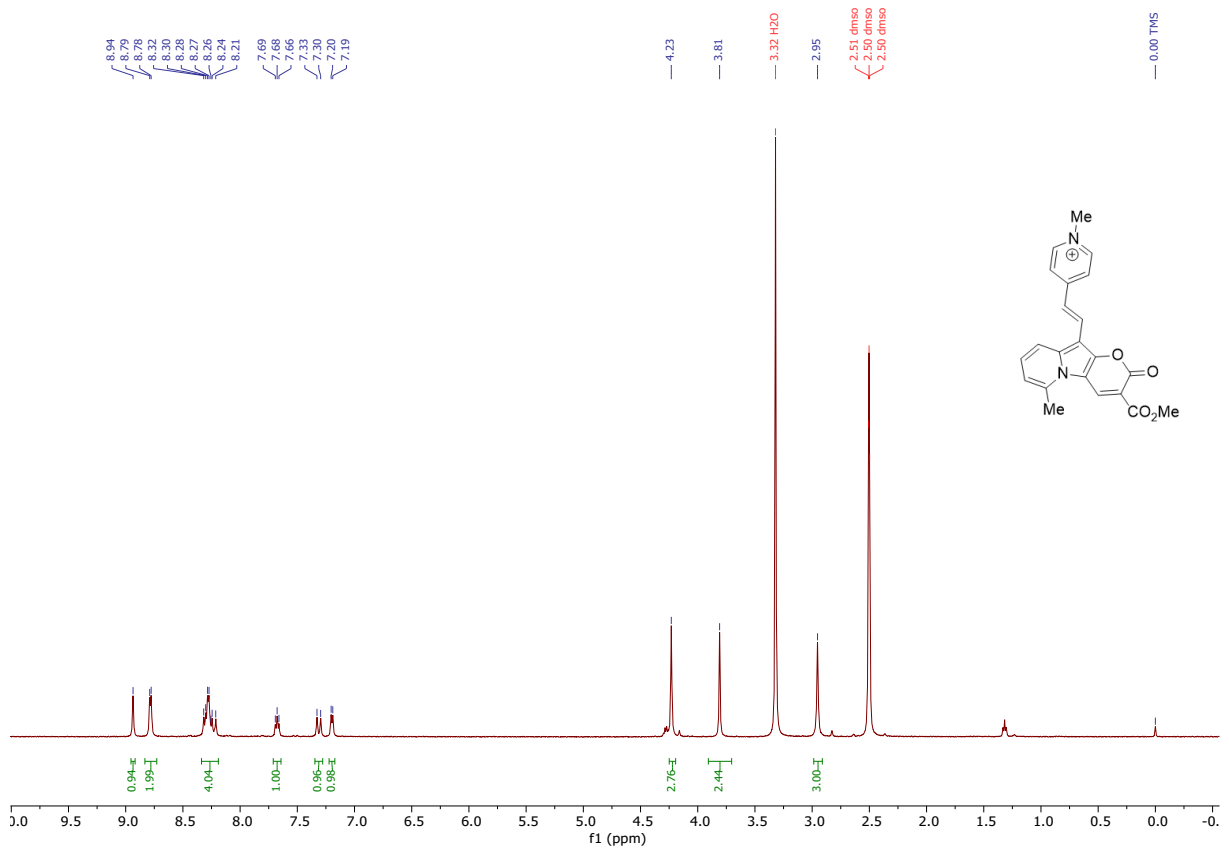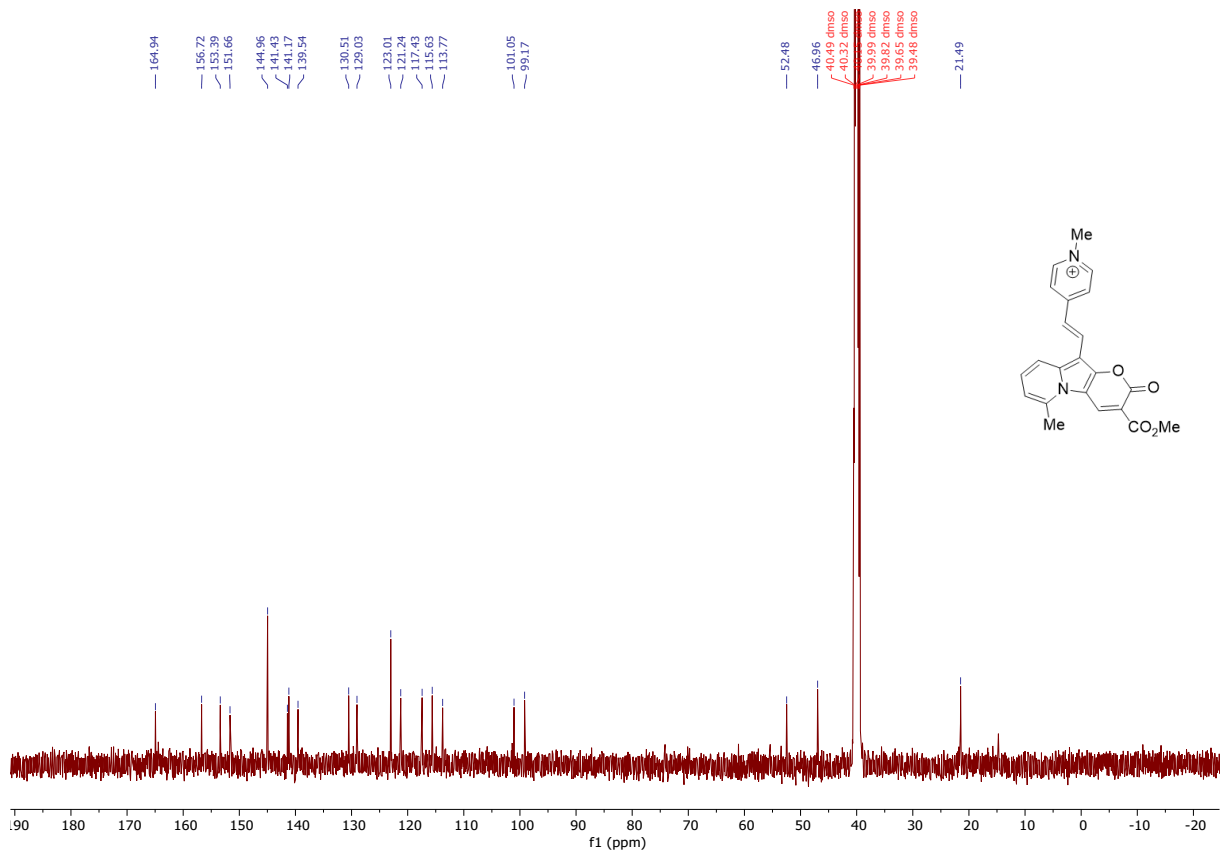

Supplement: d4qo01216j1.pdf [file d4qo01216j1.pdf]
